# Supplementary material for: Safety and Seroconversion of Immunotherapies against SARS-CoV-2 Infection: A Systematic Review and Meta-Analysis of Clinical Trials
Source: MDPI journal article supplement (doi:10.3390/pathogens10121537), 2021-11-24
Supplement: s1 [file s1]

Table S2. Clinical trials for immune augmentation against SARS-CoV-2 virus infection

| Strategy              | NCT Number  | Title                                                                                                                                                                                                                                          | Route | Treatment | Age                   | Phase<br>s | Enrollment | Start Date |
|-----------------------|-------------|------------------------------------------------------------------------------------------------------------------------------------------------------------------------------------------------------------------------------------------------|-------|-----------|-----------------------|------------|------------|------------|
| Mycobacterium vaccine | NCT04328441 | Reducing Health Care Workers Absenteeism in Covid-19 Pandemic Through BCG Vaccine                                                                                                                                                              | IC    | BCG       | 18 Years and older    | 3          | 1500       | 2020-03-25 |
|                       | NCT04327206 | BCG Vaccination to Protect Healthcare Workers Against COVID-19                                                                                                                                                                                 | ID    | BCG       | 18 Years and older    | 3          | 4170       | 2020-03-30 |
|                       | NCT04417335 | Reducing COVID-19 Related Hospital Admission in Elderly by BCG Vaccination                                                                                                                                                                     | IC    | BCG       | 60 Years and older    | 4          | 2014       | 2020-04-16 |
|                       | NCT04350931 | Application of BCG Vaccine for Immune-prophylaxis Among Egyptian Healthcare Workers During the Pandemic of COVID-19                                                                                                                            | ID    | BCG       | 18 Years and older    | 3          | 900        | 2020-04-20 |
|                       | NCT04362124 | Performance Evaluation of BCG vs COVID-19                                                                                                                                                                                                      | ID    | BCG       | 18 Years to 65 Years  | 3          | 1000       | 2020-04-20 |
|                       | NCT04348370 | BCG Vaccine for Health Care Workers as Defense Against SARS-COV2                                                                                                                                                                               | ID    | BCG       | 18 Years to 74 Years  | 4          | 700        | 2020-04-20 |
|                       | NCT04373291 | Using BCG Vaccine to Protect Health Care Workers in the COVID-19 Pandemic                                                                                                                                                                      | ID    | BCG       | 18 Years to 100 Years | 3          | 1500       | 2020-05-01 |
|                       | NCT04379336 | BCG Vaccination for Healthcare Workers in COVID-19 Pandemic                                                                                                                                                                                    | ID    | BCG       | 18 Years and older    | 3          | 500        | 2020-05-04 |
|                       | NCT04384549 | Efficacy of BCG Vaccination in the Prevention of COVID19 Via the Strengthening of Innate Immunity in Health Care Workers                                                                                                                       | ID    | BCG       | 18 Years and older    | 3          | 1120       | 2020-05-11 |
|                       | NCT04387409 | A Phase III, Double-blind, Randomized, Placebo-controlled Multicentre Clinical Trial to Assess the Efficacy and Safety of VPM1002 in Reducing Healthcare Professionals' Absenteeism in the SARS-CoV-2 Pandemic by Modulating the Immune System | ID    | VPM1002   | 18 Years and older    | 3          | 1200       | 2020-05-18 |
|                       | NCT04387409 | Study to Assess VPM1002 in Reducing Healthcare Professionals' Absenteeism in COVID-19 Pandemic                                                                                                                                                 | ID    | VPM1002   | 18 Years and older    | 3          | 1200       | 2020-05-25 |
|                       | NCT04414267 | Bacillus Calmette-guérin Vaccination to Prevent COVID-19                                                                                                                                                                                       | ID    | BCG       | 50 Years and older    | 4          | 900        | 2020-05-26 |
|                       | NCT04369794 | COVID-19: BCG As Therapeutic Vaccine, Transmission Limitation, and Immunoglobulin Enhancement                                                                                                                                                  | ID    | BCG       | 18 Years and older    | 4          | 1000       | 2020-06-01 |
|                       | NCT04435379 | Study to Assess VPM1002 in Reducing Hospital Admissions and/or Severe Respiratory Infectious Diseases in Elderly in COVID-19 Pandemic                                                                                                          | ID    | VPM1002   | 60 Years and older    | 3          | 2038       | 2020-06-01 |
|                       | NCT04439045 | Efficacy and Safety of VPM1002 in Reducing SARS-CoV-2 (COVID-19) Infection Rate and Severity                                                                                                                                                   | ID    | VPM1002   | 18 Years and older    | 3          | 3626       | 2020-06-14 |
| Training immunity     | NCT04442048 | Immunization With IMM-101 vs Observation for Prevention of Respiratory and Severe COVID-19 Related Infections in Cancer Patients at Increased Risk of Exposure                                                                                 | UNS   | IMM-101   | 18 Years and older    | 3          | 1500       | 2020-07-01 |
|                       | NCT04475302 | BCG Vaccine in Reducing Morbidity and Mortality in Elderly Individuals in COVID-19 Hotspots                                                                                                                                                    | ID    | BCG       | 60 Years to 80 Year   | 3          | 2175       | 2020-07-01 |
|                       | NCT04461379 | Prevention, Efficacy and Safety of BCG Vaccine in COVID-19 Among Healthcare Workers                                                                                                                                                            | ID    | BCG       | 18 Years and older    | 3          | 908        | 2020-07-06 |
|                       | NCT04648800 | Clinical Trial Evaluating the Effect of BCG Vaccination on the Incidence and Severity of SARS-CoV-2 Infections Among Healthcare Professionals During the COVID-19 Pandemic in Poland                                                           | ID    | BCG       | 25 Years and older    | 3          | 1000       | 2020-07-07 |
|                       | NCT04453488 | Clinical Trial to Evaluate the Efficacy of RUTII® Against SARS-COV-2 Infection (COVID-19) in Healthcare Workers                                                                                                                                | SC    | RUTII®    | 18 Years and older    | 3          | 315        | 2020-07-30 |
|                       | NCT04537663 | Prevention Of Respiratory Tract Infection And Covid-19 Through BCG Vaccination In Vulnerable Older Adults                                                                                                                                      | ID    | BCG       | 60 Years and older    | 4          | 5200       | 2020-08-25 |
|                       | NCT04534803 | BCG Against Covid-19 for Prevention and Amelioration of Severity Trial (BAC to the PAST)                                                                                                                                                       | ID    | BCG       | 70 Years and older    | 3          | 2100       | 2020-09-01 |
|                       | NCT04542330 | Using BCG to Protect Senior Citizens During the COVID-19 Pandemic                                                                                                                                                                              | ID    | BCG       | 65 Years to 110 Years | 3          | 1900       | 2020-09-15 |

|                |             |                                                                                                                               |      |                          |                       |       |      |            |
|----------------|-------------|-------------------------------------------------------------------------------------------------------------------------------|------|--------------------------|-----------------------|-------|------|------------|
|                | NCT04659941 | Use of BCG Vaccine as a Preventive Measure for COVID-19 in Health Care Workers                                                | ID   | BCG                      | 18 Years and older    | 2     | 1000 | 2020-10-01 |
|                | NCT04641858 | BCG to Reduce Absenteeism Among Health Care Workers During the COVID-19 Pandemic                                              | ID   | BCG                      | 18 Years and older    | 4     | 1050 | 2020-11-01 |
|                | NCT04632537 | BCG Vaccination to Prevent COVID-19                                                                                           | ID   | BCG                      | 18 Years to 64 Years  | 3     | 550  | 2020-11-01 |
| MMR vaccine    | NCT04357028 | Measles Vaccine in HCW                                                                                                        | SC   | MMR                      | 18 Years to 50 Years  | 3     | 200  | 2020-05-01 |
|                | NCT04475081 | Use of a Live Attenuated Vaccine as an Immune-based Preventive Against COVID-19-associated Sepsis                             | SC   | MMR                      | 18 Years to 70 Years  | 3     | 60   | 2020-08-17 |
| Polio vaccine  | NCT04445428 | OPV as Potential Protection Against COVID-19                                                                                  | ORAL | OPV                      | 50 Years and older    | 4     | 3400 | 2020-07-15 |
|                | NCT04540185 | A Phase 3 Randomized Double Blind Efficacy and Safety Study of Oral Polio Vaccine and NA-831 for Covid-19                     | ORAL | OPV                      | 18 Years and older    | 3     | 3600 | 2020-11-01 |
|                | NCT04639375 | Polio Vaccine (IPV) for SARS-CoV-2 and Prevention of Coronavirus Disease (COVID-19)                                           | UNS  | IPV                      | 18 Years to 80 Years  | 4     | 25   | 2020-11-15 |
| Zoster vaccine | NCT04523246 | Training the Innate Immune System Against SARS-CoV-2 (COVID-19) Using the Shingrix Vaccine in Nursing Home Residents          | IM   | Zoster                   | 65 Years to 100 Years | 1     | 250  | 2020-09-01 |
|                | NCT04833101 | Study on Sequential Immunization of Recombinant COVID-19 Vaccine (Ad5 Vector) and RBD-based Protein Subunit Vaccine           | UNS  | ZF2001                   | 18 Years and older    | 4     | 120  | 2021-04-07 |
|                | NCT04368988 | Evaluation of the Safety and Immunogenicity of a SARS-CoV-2 rS (COVID-19) Nanoparticle Vaccine With/Without Matrix-M Adjuvant | IM   | SARS-CoV-2 rS            | 18 Years to 59 Years  | 1     | 131  | 2020-05-15 |
|                | NCT04405908 | SCB-2019 as COVID-19 Vaccine                                                                                                  | IM   | SCB-2019                 | 18 Years to 75 Years  | 1     | 150  | 2020-06-20 |
|                | NCT04445194 | Phase I Clinical Study of Recombinant Novel Coronavirus Vaccine                                                               | IM   | SARS-CoV-2 rS (CHO cell) | 18 Years to 59 Year   | 1     | 50   | 2020-06-22 |
|                | NCT04453852 | Monovalent Recombinant COVID19 Vaccine                                                                                        | UNS  | SARS-CoV-2 rS            | 18 Years to 65 Years  | 1     | 40   | 2020-06-30 |
|                | NCT04428073 | Therapeutic Vaccine Trial of COVID-19 for Severe Acute Respiratory Syndrome Coronavirus 2 (SARS-CoV-2) Infection              | UNS  | Advax-CpG55.2            | 18 Years to 60 Years  | 1     | 32   | 2020-07-01 |
|                | NCT04466085 | Clinical Study of Recombinant Novel Coronavirus Vaccine                                                                       | IM   | SARS-CoV-2 rS (CHO cell) | 18 Years to 59 Years  | 2     | 900  | 2020-07-12 |
|                | NCT04495933 | A Study on the Safety, Tolerability and Immune Response of SARS-CoV-2 Sclamp (COVID-19) Vaccine in Healthy Adults             | IM   | Sclamp                   | 18 Years to 55 Years  | 1     | 120  | 2020-07-13 |
|                | NCT03305341 | Discovery Stage (Proof-of-concept) COVID-19 Antigen Presentation Therapeutic Vaccine                                          | ID   | SARS-CoV-2 rS/GM-CSF     | 22 Years to 72 Years  | 1     | 20   | 2020-07-18 |
|                | NCT04527575 | Study of the Safety, Reactogenicity and Immunogenicity of "EpiVacCorona" Vaccine for the Prevention of COVID-19               | IM   | EpiVacCorona             | 18 Years to 60 Years  | 1 & 2 | 100  | 2020-07-27 |
|                | NCT04533399 | A Study Looking at the Effectiveness and Safety of a COVID-19 Vaccine in South African Adults                                 | IM   | SARS-CoV-2 rS/Matrix-M1  | 18 Years to 64 Years  | 2     | 2904 | 2020-08-17 |
|                | NCT04550351 | Recombinant New Coronavirus Vaccine (CHO Cells) to Prevent SARS-CoV-2 Phase I Clinical Trial (??0 Years Old)                  | IM   | SARS-CoV-2 rS (CHO cell) | 60 Years and older    | 1 & 2 | 50   | 2020-08-19 |
|                | NCT04522089 | A Study to Evaluate the Safety and Immunogenicity of COVID-19 (AdimrSC-2f) Vaccine                                            | UNS  | AdimrSC-2f               | 20 Years to 60 Years  | 1     | 70   | 2020-08-20 |
|                | NCT04530656 | Phase I Trial of a Recombinant SARS-CoV-2 Vaccine (Sf9 Cell)                                                                  | IM   | SARS-CoV-2 rS (Sf9 Cell) | 18 Years and older    | 1     | 168  | 2020-08-28 |
|                | NCT04487210 | A Phase I, Prospective, Open-Labelled Study to Evaluate the Safety and Immunogenicity of MVC-COV1901                          | IM   | MVC-COV1901              | 20 Years to 50 Year   | 1     | 45   | 2020-09-01 |
|                | NCT04537208 | Study of Recombinant Protein Vaccine Formulations Against COVID-19 in Healthy Adults 18 Years of Age and Older                | IM   | SARS-CoV-2 rS            | 18 Years and older    | 1 & 2 | 440  | 2020-09-03 |
|                | NCT04473690 | KBP-201 COVID-19 Vaccine Trial in Healthy Volunteers                                                                          | UNS  | KBP-COVID-19             | 18 Years to 70 Years  | 1 & 2 | 180  | 2020-09-14 |
|                | NCT04545749 | A Study to Evaluate the Safety, Tolerability, and Immunogenicity of UB-612 COVID-19 Vaccine                                   | UNS  | UB-612                   | 20 Years to 55 Years  | 1     | 60   | 2020-09-25 |

|                 |             |                                                                                                                                                                                                                                                        |     |                           |                       |       |       |            |
|-----------------|-------------|--------------------------------------------------------------------------------------------------------------------------------------------------------------------------------------------------------------------------------------------------------|-----|---------------------------|-----------------------|-------|-------|------------|
| Protein vaccine | NCT04583995 | A Study Looking at the Effectiveness, Immune Response, and Safety of a COVID-19 Vaccine in Adults in the United Kingdom                                                                                                                                | IM  | SARS-CoV-2 rS/Matrix M1   | 18 Years to 84 Years  | 3     | 15000 | 2020-09-28 |
|                 | NCT04546841 | Safety and Immunogenicity Trial of Multi-peptide Vaccination to Prevent COVID-19 Infection in Adults                                                                                                                                                   | SC  | SARS-CoV-2 rS             | 18 Years and older    | 1     | 36    | 2020-09-30 |
|                 | NCT04636333 | Phase I Trial of a Recombinant SARS-CoV-2 Vaccine (CHO Cell)                                                                                                                                                                                           | IM  | SARS-CoV-2 rS (CHO cell)  | 18 Years and older    | 1     | 216   | 2020-10-30 |
|                 | NCT04611802 | A Study Looking at the Efficacy, Immune Response, and Safety of a COVID-19 Vaccine in Adults at Risk for SARS-CoV-2                                                                                                                                    | IM  | SARS-CoV-2 rS/Matrix-M1   | 18 Years and older    | 3     | 30000 | 2020-11-01 |
|                 | NCT04640402 | A Phase 2 Clinical Trial of Recombinant Corona Virus Disease-19 (COVID-19) Vaccine (Sf9 Cells)                                                                                                                                                         | UNS | SARS-CoV-2 rS (Sf9 cells) | 18 Years to 85 Years  | 2     | 960   | 2020-11-17 |
|                 | NCT04780035 | Study of the Tolerability, Safety, Immunogenicity and Preventive Efficacy of the EpiVacCorona Vaccine for the Prevention of COVID-19                                                                                                                   | IM  | EpiVacCorona              | 18 Years and older    | 3     | 3000  | 2020-11-18 |
|                 | NCT04683484 | A Clinical Trial to Assess the Safety and Immunogenicity of Nanocovax in Healthy Volunteers                                                                                                                                                            | IM  | Nanocovax                 | 12 Years to 75 Years  | 1 & 2 | 620   | 2020-12-10 |
|                 | NCT04806529 | An Efficacy, Immunogenicity and Safety Study Investigating an Adjuvanted SARS-CoV-2 Influenza Vaccine to Protect Against COVID-19 in Adults Over Aged 18 Years-old and Older                                                                           | IM  | aCoV2                     | 18 Years and older    | 2 & 3 | 0     | 2020-12-15 |
|                 | NCT04646590 | A Phase III Clinical Trial to Determine the Safety and Efficacy of ZF2001 for Prevention of COVID-19                                                                                                                                                   | IM  | SARS-CoV-2 rS (CHO cell)  | 18 Years and older    | 3     | 29000 | 2020-12-16 |
|                 | NCT04760743 | Safety and Immunogenicity of a SARS-CoV-2 Vaccine (NBP2001) in Healthy Adults (COVID-19)                                                                                                                                                               | IM  | NBP2001                   | 19 Years to 55 Years  | 1     | 50    | 2020-12-17 |
|                 | NCT04695652 | A Study to Evaluate MVC-COV1901 Vaccine Against COVID-19 in Adult                                                                                                                                                                                      | IM  | MVC-COV1901               | 20 Years and older    | 2     | 3700  | 2020-12-30 |
|                 | NCT04742738 | Safety and Immunogenicity Study of SARS-CoV-2 Nanoparticle Vaccine (GBP510) Adjuvanted With Aluminum Hydroxide (COVID-19)                                                                                                                              | IM  | GBP510                    | 19 Years to 85 Years  | 1 & 2 | 260   | 2021-01-20 |
|                 | NCT04773067 | A Study to Evaluate UB-612 COVID-19 Vaccine in Adolescent, Younger and Elderly Adult Volunteers                                                                                                                                                        | UNS | UB-612                    | 12 Years to 85 Years  | 2     | 3850  | 2021-01-30 |
|                 | NCT04683224 | A Study to Evaluate the Safety, Immunogenicity, and Efficacy of UB-612 COVID-19 Vaccine                                                                                                                                                                | IM  | UB-612                    | 18 Years and older    | 2 & 3 | 7320  | 2021-02-01 |
|                 | NCT04718467 | Phase IIb Clinical Trial of Recombinant Novel Coronavirus Pneumonia (COVID-19) Vaccine (Sf9 Cells)                                                                                                                                                     | IM  | SARS-CoV-2 rS (Sf9 cells) | 18 Years to 85 Years  | 2     | 4000  | 2021-02-01 |
|                 | NCT04750343 | Safety and Immunogenicity Study of SARS-CoV-2 Nanoparticle Vaccine (GBP510) Adjuvanted With or Without AS03 (COVID-19)                                                                                                                                 | IM  | GBP510                    | 19 Years to 85 Years  | 1 & 2 | 320   | 2021-02-03 |
|                 | NCT04686773 | Study in Adults to Determine the Safety and Immunogenicity of AZD1222, a Non-replicating ChAdOx1 Vector Vaccine, Given in Combination With rAd26-S, Recombinant Adenovirus Type 26 Component of Gam-COVID-Vac Vaccine, for the Prevention of COVID-19. | IM  | AZD1222                   | 18 Years to 100 Years | 2     | 100   | 2021-02-10 |
|                 | NCT04702178 | A Clinical Trial of COVAC-2 in Healthy Adults                                                                                                                                                                                                          | IM  | COVAC-2                   | 18 Years and older    | 1     | 108   | 2021-02-10 |
|                 | NCT04758962 | A Study of the Safety of and Immune Response to Varying Doses of a Vaccine Against COVID-19 in Healthy Adults                                                                                                                                          | IM  | CoV2 SAM                  | 18 Years to 50 Year   | 1     | 40    | 2021-02-15 |
|                 | NCT04783311 | Safety, Tolerance and Immunogenicity of EuCorVac-19 for the Prevention of COVID-19 in Healthy Adults                                                                                                                                                   | IM  | EuCorVac-19               | 19 Years to 75 Years  | 1 & 2 | 280   | 2021-02-23 |
|                 | NCT04712110 | A Study of TAK-019 in Healthy Japanese Adults (COVID-19)                                                                                                                                                                                               | IM  | TAK-019                   | 20 Years and older    | 1 & 2 | 200   | 2021-02-24 |
|                 | NCT04762680 | Study of Recombinant Protein Vaccine With Adjuvant Against COVID-19 in Adults 18 Years of Age and Older                                                                                                                                                | IM  | VAT00002                  | 18 Years and older    | 2     | 722   | 2021-02-24 |

|             |                                                                                                                                                    |     |                                                            |                       |       |       |            |
|-------------|----------------------------------------------------------------------------------------------------------------------------------------------------|-----|------------------------------------------------------------|-----------------------|-------|-------|------------|
| NCT04672395 | A Controlled Phase 2/3 Study of Adjuvanted Recombinant SARS-CoV-2 Trimeric S-protein Vaccine (SCB-2019) for the Prevention of COVID-19             | IM  | SCB-2019                                                   | 18 Years and older    | 2 & 3 | 22000 | 2021-03-01 |
| NCT04813562 | Immunogenicity and Safety of Recombinant COVID-19 Vaccine (CHO Cells)                                                                              | UNS | SARS-CoV-2 rS (CHO cells)                                  | 18 Years to 85 Years  | 2     | 480   | 2021-03-23 |
| NCT04818801 | Safety, Reactogenicity and Immunogenicity Study of ReCOV                                                                                           | IM  | SARS-CoV-2 rS (CHO cells)                                  | 18 Years to 80 Years  | 1     | 160   | 2021-04-01 |
| NCT04784767 | SARS-COV-2-Spike-Feritin-Nanoparticle (SpFN) Vaccine With ALFQ Adjuvant for Prevention of COVID-19 in Healthy Adults                               | UNS | SPFN_1B-06-PL                                              | 18 Years to 55 Years  | 1     | 72    | 2021-04-05 |
| NCT04681092 | Anti-COVID19 AKS-452 - ACT Study                                                                                                                   | IM  | AKS-452                                                    | 18 Years to 65 Years  | 1 & 2 | 130   | 2021-04-12 |
| NCT04869592 | A Clinical Trial to Evaluate the Recombinant SARS-CoV-2 Vaccine (CHO Cell) for COVID-19                                                            | IM  | SARS-CoV-2 rS                                              | 3 Years and older     | 1 & 2 | 3580  | 2021-04-25 |
| NCT04822025 | A Study to Evaluate MVC-COV1901 Vaccine Against COVID-19 in Elderly Adults                                                                         | IM  | MVC-COV1901                                                | 65 Years and older    | 2     | 400   | 2021-05-01 |
| NCT04885361 | To Evaluate the Safety, and Immunogenicity of Vaccine Candidate Against COVID-19, in Healthy Adults                                                | SC  | CoVepiT                                                    | 18 Years to 45 Years  | 1     | 48    | 2021-05-10 |
| NCT04887207 | A Global Phase III Clinical Trial of Recombinant COVID-19 Vaccine (Sf9 Cells)                                                                      | UNS | SARS-CoV-2 Rs (Sf9 cells)                                  | 18 Years and older    | 3     | 40000 | 2021-06-01 |
| NCT04706143 | Immunologic Responses to Single and Double Doses of COVID-19 Vaccines in Egyptians                                                                 | UNS | mRNA vs viral vector vs inactivated                        | 25 Years to 65 Years  | N/A   | 100   | 2021-01-15 |
| NCT04760132 | National Cohort Study of Effectiveness and Safety of SARS-CoV-2/COVID-19 Vaccines (ENFORCE)                                                        | UNS | BNT162b2 vs mRNA-1273 vs AZD1222                           | 18 Years and older    | 4     | 10000 | 2021-02-08 |
| NCT04885764 | Profiling Antibody Status and Vaccine Effectiveness in Post Vaccination With SARS CoV2 in Ain Shams University                                     | IM  | Sinopharm vs AZD1222                                       | 18 Years and older    | 2 & 3 | 4000  | 2021-02-23 |
| NCT04776317 | Chimpanzee Adenovirus and Self-Amplifying mRNA Prime-Boost Prophylactic Vaccines Against SARS-CoV-2 in Healthy Adults                              | IM  | ChAdV68-S vs SAM-LNP-S                                     | 18 Years to 99 Years  | 1     | 140   | 2021-03-25 |
| NCT04800133 | Covid-19 Vaccination in Adolescents                                                                                                                | IM  | BNT162b2 vs mRNA-1273 vs AZD1222                           | 11 Years to 100 Years | 2     | 900   | 2021-04-01 |
| NCT04894435 | Mix and Match of the Second COVID-19 Vaccine Dose for Safety and Immunogenicity                                                                    | IM  | BNT162b2 vs mRNA-1273 vs AZD1222                           | 18 Years to 99 Years  | 2     | 1300  | 2021-05-01 |
| NCT04898946 | Serological Response to mRNA and Inactivated COVID-19 Vaccine in Health Care Workers in Hong Kong                                                  | UNS | Biological: CoronaVac Vaccine Biological: BNT162b2 Vaccine | 18 Years and older    | N/A   | 400   | 2021-03-08 |
| NCT04283461 | Safety and Immunogenicity Study of 2019-nCoV Vaccine (mRNA-1273) for Prophylaxis SARS CoV-2 Infection (COVID-19)                                   | IM  | mRNA-1273                                                  | 18 Years to 99 Years  | 2     | 105   | 2020-03-03 |
| NCT04380701 | A Trial Investigating the Safety and Effects of Four BNT162 Vaccines Against COVID-2019 in Healthy Adults                                          | IM  | BNT162                                                     | 18 Years to 55 Years  | 1 & 2 | 200   | 2020-04-23 |
| NCT04368728 | Study to Describe the Safety, Tolerability, Immunogenicity, and Potential Efficacy of RNA Vaccine Candidates Against COVID-19 in Healthy Adults    | IM  | BNT162                                                     | 18 Years to 85 Years  | 1 & 2 | 7600  | 2020-04-29 |
| NCT04405076 | Dose-Confirmation Study to Evaluate the Safety, Reactogenicity, and Immunogenicity of mRNA-1273 COVID-19 Vaccine in Adults Aged 18 Years and Older | UNS | mRNA-1273                                                  | 18 Years and older    | 2     | 600   | 2020-05-29 |
| NCT04449276 | A Study to Evaluate the Safety, Reactogenicity and Immunogenicity of Vaccine CVnCoV in Healthy Adults                                              | IM  | CVnCoV                                                     | 18 Years to 60 Years  | 1     | 168   | 2020-06-18 |
| NCT04470427 | A Study to Evaluate Efficacy, Safety, and Immunogenicity of mRNA-1273 Vaccine in Adults Aged 18 Years and Older to Prevent COVID-19                | IM  | mRNA-1273                                                  | 18 Years and older    | 3     | 30000 | 2020-07-27 |

|             |             |                                                                                                                                                                                                                                                        |     |                       |                       |       |       |            |
|-------------|-------------|--------------------------------------------------------------------------------------------------------------------------------------------------------------------------------------------------------------------------------------------------------|-----|-----------------------|-----------------------|-------|-------|------------|
| RNA vaccine | NCT04523571 | Safety and Immunogenicity of SARS-CoV-2 mRNA Vaccine (BNT162b1) in Chinese Healthy Subjects                                                                                                                                                            | IM  | BNT162b1              | 18 Years to 85 Years  | 1     | 144   | 2020-07-28 |
|             | NCT04480957 | Ascending Dose Study of Investigational SARS-CoV-2 Vaccine ARCT-021 in Healthy Adult Subjects                                                                                                                                                          | IM  | ARCT-021              | 21 Years to 80 Years  | 1 & 2 | 92    | 2020-08-04 |
|             | NCT04515147 | A Dose-Confirmation Study to Evaluate the Safety, Reactogenicity and Immunogenicity of Vaccine CVnCoV in Healthy Adults                                                                                                                                | IM  | CVnCoV 6              | 18 Years and older    | 2     | 691   | 2020-08-17 |
|             | NCT04537949 | A Trial Investigating the Safety and Effects of One BNT162 Vaccine Against COVID-19 in Healthy Adults                                                                                                                                                  | IM  | BNT162b3              | 18 Years to 85 Years  | 1 & 2 | 120   | 2020-09-09 |
|             | NCT04588480 | Study to Evaluate the Safety, Tolerability, and Immunogenicity of an RNA Vaccine Candidate Against COVID-19 in Healthy Japanese Adults                                                                                                                 | IM  | BNT162b2              | 20 Years to 85 Years  | 1 & 2 | 160   | 2020-10-21 |
|             | NCT04649021 | Safety and Immunogenicity of SARS-CoV-2 mRNA Vaccine (BNT162b2) in Chinese Healthy Population                                                                                                                                                          | IM  | BNT162b2              | 18 Years to 85 Years  | 2     | 950   | 2020-12-04 |
|             | NCT04649151 | A Study to Evaluate the Safety, Reactogenicity, and Effectiveness of mRNA-1273 Vaccine in Adolescents 12 to <18 Years Old to Prevent COVID-19                                                                                                          | IM  | mRNA-1273             | 12 Years to 17 Years  | 2 & 3 | 3000  | 2020-12-09 |
|             | NCT04652102 | A Study to Determine the Safety and Efficacy of SARS-CoV-2 mRNA Vaccine CVnCoV in Adults for COVID-19                                                                                                                                                  | IM  | CVnCoV                | 18 Years and older    | 2 & 3 | 36500 | 2020-12-14 |
|             | NCT04674189 | A Study to Evaluate the Safety and Immunogenicity of Vaccine CVnCoV in Healthy Adults in Germany for COVID-19                                                                                                                                          | IM  | CVnCoV                | 18 Years and older    | 3     | 2520  | 2020-12-23 |
|             | NCT04842708 | Evaluation of Anti-COVID 19 Pfizer Vaccination Effect on COVID 19 Detection Using Breath Analysis                                                                                                                                                      | UNS | BNT162b2              | 18 Years to 75 Years  | N/A   | 50    | 2020-12-24 |
|             | NCT04566276 | ChulaCov19 mRNA Vaccine in Healthy Adults                                                                                                                                                                                                              | IM  | ChulaCov19            | 18 Years to 75 Years  | 1     | 96    | 2021-01-01 |
|             | NCT04713163 | COVID-19 Vaccine Induced Immunity                                                                                                                                                                                                                      | UNS | BNT162b2 or mRNA-1273 | 18 Years and older    | N/A   | 200   | 2021-01-01 |
|             | NCT04728347 | Open Label Extension Study to Assess the Safety and Long-Term Immunogenicity of ARCT-021                                                                                                                                                               | UNS | ARCT-021              | 21 Years to 80 Years  | 2     | 106   | 2021-01-04 |
|             | NCT04668339 | A Trial Evaluating the Safety and Effects of an RNA Vaccine ARCT-021 in Healthy Adults                                                                                                                                                                 | UNS | ARCT-021              | 18 Years and older    | 2     | 600   | 2021-01-07 |
|             | NCT04715438 | Vaccination Against COVID-19 in Cancer                                                                                                                                                                                                                 | UNS | mRNA-1273             | 18 Years and older    | N/A   | 873   | 2021-01-08 |
|             | NCT04765436 | PTX-COVID19-B, an mRNA Humoral Vaccine, is Intended for Prevention of COVID-19 in a General Population. This Study is Designed to Evaluate Safety, Tolerability, and Immunogenicity of PTX-COVID19-B Vaccine in Healthy Seronegative Adults Aged 18-64 | IM  | PTX-COVID19-B         | 18 Years to 64 Years  | 1     | 60    | 2021-01-14 |
|             | NCT04677660 | A Study of TAK-919 in Healthy Japanese Adults (COVID-19)                                                                                                                                                                                               | IM  | mRNA-1273             | 20 Years and older    | 1 & 2 | 200   | 2021-01-21 |
|             | NCT04733807 | Antibodies Response to mRNA Vaccine Against Covid-19                                                                                                                                                                                                   | UNS | BNT162b2              | 18 Years to 80 Years  | N/A   | 600   | 2021-01-28 |
|             | NCT04748172 | COVID-19 Vaccine and Ovarian Reserve                                                                                                                                                                                                                   | UNS | BNT162b2 or mRNA-1273 | 18 Years to 42 Years  | N/A   | 200   | 2021-02-01 |
|             | NCT04862806 | Safety, Efficacy of BNT162b2 mRNA Vaccine in CLL                                                                                                                                                                                                       | UNS | BNT162b2              | 18 Years and older    | N/A   | 1000  | 2021-02-01 |
|             | NCT04748471 | Immunogenicity and Safety of VaccinemRNA-1273 in Elderly Volunteers (Over 65 y) Compared to Younger Ones (18-45y)                                                                                                                                      | UNS | mRNA-1273             | 18 Years and older    | 2     | 180   | 2021-02-10 |
|             | NCT04756817 | Immunogenicity of the BNT162b2 Covid-19 Vaccine in Elderly People Aged 85 and Older in Greece                                                                                                                                                          | UNS | BNT162b2              | 85 Years to 100 Years | N/A   | 500   | 2021-02-13 |
|             | NCT04713553 | A Phase 3 Study to Evaluate the Safety, Tolerability, and Immunogenicity of Multiple Production Lots and Dose Levels of BNT162b2 Against COVID-19 in Healthy Participants                                                                              | IM  | BNT162b2              | 12 Years to 50 Years  | 3     | 1530  | 2021-02-15 |

|             |                                                                                                                                                                                    |     |                            |                           |       |      |            |
|-------------|------------------------------------------------------------------------------------------------------------------------------------------------------------------------------------|-----|----------------------------|---------------------------|-------|------|------------|
| NCT04839315 | COVID-19 Vaccination in Rheumatic Disease Patients                                                                                                                                 | UNS | BNT162b2 or mRNA-1273      | 18 Years and older        | 1     | 100  | 2021-02-15 |
| NCT04754594 | Study to Evaluate the Safety, Tolerability, and Immunogenicity of SARS CoV-2 RNA Vaccine Candidate (BNT162b2) Against COVID-19 in Healthy Pregnant Women 18 Years of Age and Older | IM  | BNT162b2                   | Child, Adult, Older Adult | 2 & 3 | 4000 | 2021-02-16 |
| NCT04811391 | COVID-19 Vaccine Effectiveness in Albanian Health Workers                                                                                                                          | UNS | BNT162b2                   | 16 Years and older        | N/A   | 1500 | 2021-02-19 |
| NCT04780659 | COVID-19 Vaccination of Immunodeficient Persons (COVAXID)                                                                                                                          | UNS | BNT162b2                   | 18 Years and older        | 4     | 540  | 2021-02-23 |
| NCT04784689 | Host Immune Response to Novel RNA COVID-19 Vaccination                                                                                                                             | UNS | RNA vaccine                | 18 Years and older        | n     | 400  | 2021-02-24 |
| NCT04769258 | Effectiveness and Safety of COVID-19 Vaccine in Patients With IBD Treated With Immunomodulatory or Biological Drugs (ESCAPE-IBD)                                                   | UNS | BNT162b2                   | 18 Years and older        | N/A   | 1380 | 2021-03-01 |
| NCT04824638 | BNT162b2 Vaccination With Two Doses in COVID-19 Negative Adult Volunteers and With a Single Dose in COVID-19 Positive Adult Volunteers                                             | IM  | BNT162b2                   | 18 Years and older        | 2     | 300  | 2021-03-08 |
| NCT04813796 | A Study to Evaluate Safety, Reactogenicity, and Immunogenicity of mRNA-1283 and mRNA-1273 Vaccines in Healthy Adults Between 18 Years and 55 Years of Age to Prevent COVID-19      | IM  | mRNA-1283 vs mRNA-1273     | 18 Years to 55 Years      | 1     | 125  | 2021-03-11 |
| NCT04806113 | COVID-19 Vaccine in Immunosuppressed Adults With Autoimmune Diseases                                                                                                               | IM  | mRNA-1273                  | 18 Years and older        | 3     | 220  | 2021-03-11 |
| NCT04798027 | Study of mRNA Vaccine Formulation Against COVID-19 in Healthy Adults 18 Years of Age and Older                                                                                     | IM  | RNA vaccine                | 18 Years and older        | 1 & 2 | 333  | 2021-03-12 |
| NCT04821674 | Study of DS-5670a (COVID-19 Vaccine) in Japanese Healthy Adults and Elderly Subjects                                                                                               | IM  | DS-5670a                   | 20 Years to 74 Years      | 1 & 2 | 152  | 2021-03-15 |
| NCT04796896 | A Study to Evaluate Safety and Effectiveness of mRNA-1273 Vaccine in Healthy Children Between 6 Months of Age and Less Than 12 Years of Age                                        | IM  | mRNA-1273                  | 6 Months to 11 Years      | 2 & 3 | 7050 | 2021-03-15 |
| NCT04816643 | Study to Evaluate the Safety, Tolerability, and Immunogenicity of an RNA Vaccine Candidate Against COVID-19 in Healthy Children <12 Years of Age                                   | UNS | BNT162b2                   | 6 Months to 11 Years      | 1 & 2 | 4644 | 2021-03-24 |
| NCT04785144 | Safety and Immunogenicity Study of a SARS-CoV-2 (COVID-19) Variant Vaccine (mRNA-1273.351) in Naïve and Previously Vaccinated Adults                                               | IM  | mRNA-1273 vs mRNA-1273.351 | 18 Years to 99 Years      | 1     | 210  | 2021-03-29 |
| NCT04816669 | Study to Evaluate the Safety, Tolerability, and Immunogenicity of Multiple Formulations of BNT162b2 Against COVID-19 in Healthy Adults                                             | IM  | BNT162b2                   | 18 Years to 55 Years      | 3     | 610  | 2021-04-01 |
| NCT04818736 | COVID-19 Vaccine For Indirect Protection                                                                                                                                           | UNS | mRNA-1273                  | Child, Adult, Older Adult | 4     | 0    | 2021-04-15 |
| NCT04860297 | A Study to Evaluate Safety and Immunogenicity of mRNA-1273 Vaccine to Prevent COVID-19 in Adult Organ Transplant Recipients and in Healthy Adult Participants                      | IM  | mRNA-1273                  | 18 Years and older        | 3     | 240  | 2021-04-16 |
| NCT04852978 | COVID-19 Study to Assess Immunogenicity, Safety, and Tolerability of Moderna mRNA-1273 Vaccine Administered With Casirivimab+Imdevimab in Healthy Adult Volunteers                 | IM  | mRNA-1273                  | 18 Years to 90 Years      | 2     | 180  | 2021-04-20 |
| NCT04860258 | A Study to Evaluate Safety, Reactogenicity and Immunogenicity of the SARS-CoV-2 mRNA Vaccine CVnCoV in Adults With Co-morbidities for COVID-19                                     | IM  | CVnCoV                     | 18 Years and older        | 3     | 1200 | 2021-04-22 |
| NCT04860739 | Vaccination With COMIRNATY in Subjects With a VAXZEVRIA First Dose                                                                                                                 | UNS | BNT162b2                   | 18 Years to 60 Years      | 2     | 676  | 2021-04-24 |
| NCT04863131 | Safety and Immunogenicity of EXG-5003                                                                                                                                              | ID  | EXG-5003                   | 20 Years to 55 Years      | 1 & 2 | 60   | 2021-04-28 |

|                        |             |                                                                                                                                                                                                                                                                                                             |                 |                       |                           |       |       |            |
|------------------------|-------------|-------------------------------------------------------------------------------------------------------------------------------------------------------------------------------------------------------------------------------------------------------------------------------------------------------------|-----------------|-----------------------|---------------------------|-------|-------|------------|
| Active<br>immuni<br>ty | NCT04847050 | A Trial of the Safety and Immunogenicity of the COVID-19 Vaccine (mRNA-1273) in Participants With Hematologic Malignancies and Various Regimens of Immunosuppression, and in Participants With Solid Tumors on PD1/PDL1 Inhibitor Therapy                                                                   | IM              | mRNA-1273             | 18 Years and older        | 2     | 120   | 2021-04-28 |
|                        | NCT04878796 | Effectiveness of mRNA Covid-19 Vaccines on Cancer Patients:Observational Study. (ANTICOV)                                                                                                                                                                                                                   | UNS             | mRNA-1273 vs BNT162b2 | 18 Years and older        | N/A   | 300   | 2021-05-01 |
|                        | NCT04844268 | Phase 1 Study to Assess Safety, Reactogenicity and Immunogenicity of the HDT-301 Vaccine Against COVID-19                                                                                                                                                                                                   | IM              | HDT 301               | 18 Years to 55 Years      | 1     | 78    | 2021-05-01 |
|                        | NCT04848467 | COVID-19: A Trial Studying the SARS-CoV-2 mRNA Vaccine CVnCoV to Learn About the Immune Response, the Safety, and the Degree of Typical Vaccination Reactions When CVnCoV is Given at the Same Time as a Flu Vaccine Compared to When the Vaccines Are Separately Given in Adults 60 Years of Age and Older | IM              | CVnCoV                | 60 Years and older        | 3     | 1000  | 2021-05-10 |
|                        | NCT04852861 | COVID-19: Safety and Immunogenicity of a Reduced Dose of the BioNTech/Pfizer BNT162b2 Vaccine                                                                                                                                                                                                               | UNS             | BNT162b2              | 18 Years to 55 Years      | 4     | 150   | 2021-05-10 |
|                        | NCT04838847 | A Study to Evaluate the Immunogenicity and Safety of the SARS-CoV-2 mRNA Vaccine CVnCoV in Elderly Adults Compared to Younger Adults for COVID-19                                                                                                                                                           | IM              | CVnCoV                | 18 Years and older        | 3     | 180   | 2021-05-14 |
|                        | NCT04848584 | Pfizer-BioNTech COVID-19 BNT162b2 Vaccine Effectiveness Study - Kaiser Permanente Southern California                                                                                                                                                                                                       | UNS             | BNT162b2              | 16 Years and older        | N/A   | 999   | 2021-05-15 |
|                        | NCT04889209 | Efficacy Study of Phase 1/2 Randomized Interventional Study of SARS-COV-2-Vaccine Candidates Utilizing EUA Dosing                                                                                                                                                                                           | IM              | mRNA-1273             | 18 Years to 99 Years      | 1 & 2 | 400   | 2021-05-17 |
|                        | NCT04885907 | Third Dose of Moderna in Transplant Recipients                                                                                                                                                                                                                                                              | UNS             | mRNA-1273             | 18 Years and older        | 4     | 120   | 2021-05-17 |
|                        | NCT04869358 | Exploring the Immune Response to SARS-CoV-2 COVID-19 Vaccines in Patients With Relapsing Multiple Sclerosis (RMS) Treated With Ofatumumab                                                                                                                                                                   | UNS             | RNA vaccine           | 18 Years to 100 Years     | 4     | 40    | 2021-05-24 |
| DNA<br>vaccine         | NCT04847102 | A Phase III Clinical Study of a SARS-CoV-2 Messenger Ribonucleic Acid (mRNA) Vaccine Candidate Against COVID-19 in Population Aged 18 Years and Above                                                                                                                                                       | IM              | RNA vaccine           | 18 Years and older        | 3     | 28000 | 2021-05-28 |
|                        | NCT04892888 | Survey of the Moderna COVID-19 Vaccine in People at High-Risk of Developing Severe COVID-19 Symptoms                                                                                                                                                                                                        | IM              | mRNA-1273             | Child, Adult, Older Adult | N/A   | 1000  | 2021-06-01 |
|                        | NCT04336410 | Safety, Tolerability and Immunogenicity of INO-4800 for COVID-19 in Healthy Volunteers                                                                                                                                                                                                                      | ID              | INO-4800              | 18 Years to 50 Years      | 1     | 40    | 2020-04-03 |
|                        | NCT04445389 | Safety and Immunogenicity Study of GX-19, a COVID-19 Preventive DNA Vaccine in Healthy Adults                                                                                                                                                                                                               | IM              | GX-19                 | 18 Years to 50 Years      | 1 & 2 | 210   | 2020-06-17 |
|                        | NCT04463472 | Study of COVID-19 DNA Vaccine (AG0301-COVID19)                                                                                                                                                                                                                                                              | IM              | AG0301-COVID19        | 20 Years to 65 Years      | 1 & 2 | 30    | 2020-06-29 |
|                        | NCT04447781 | Safety, Tolerability and Immunogenicity of INO-4800 Followed by Electroporation in Healthy Volunteers for COVID19                                                                                                                                                                                           | ID              | INO-4800              | 19 Years to 64 Years      | 1 & 2 | 160   | 2020-07-15 |
|                        | NCT04527081 | Study of COVID-19 DNA Vaccine (AG0302-COVID19)                                                                                                                                                                                                                                                              | IM              | AG0302-COVID19        | 20 Years to 65 Years      | 1 & 2 | 30    | 2020-08-31 |
|                        | NCT04642638 | Safety, Immunogenicity, and Efficacy of INO-4800 for COVID-19 in Healthy Seronegative Adults at High Risk of SARS-CoV-2 Exposure                                                                                                                                                                            | ID              | INO-4800              | 18 Years and older        | 2 & 3 | 6578  | 2020-11-01 |
|                        | NCT04655625 | Phase II / III Study of COVID-19 DNA Vaccine (AG0302-COVID19)                                                                                                                                                                                                                                               | IM              | AG0302-COVID19        | 18 Years and older        | 2 & 3 | 500   | 2020-11-23 |
|                        | NCT04627675 | CORVax 12: SARS-CoV-2 Spike (S) Protein Plasmid DNA Vaccine Trial for COVID-19 (SARS-CoV-2)                                                                                                                                                                                                                 | Electroporation | CORVax                | 18 Years and older        | 1     | 36    | 2020-12-01 |
|                        | NCT04591184 | A Clinical Trial of a Plasmid DNA Vaccine for COVID-19 [Covigenix VAX-001] in Adults                                                                                                                                                                                                                        | IM              | BVAX-001              | 18 Years to 84 Years      | 1     | 72    | 2020-12-01 |

|             |                                                                                                                          |     |                                          |                       |       |       |            |
|-------------|--------------------------------------------------------------------------------------------------------------------------|-----|------------------------------------------|-----------------------|-------|-------|------------|
| NCT04673149 | GLS-5310 Vaccine for the Prevention of SARS-CoV-2 (COVID-19)                                                             | IC  | GLS-5310                                 | 19 Years to 65 Years  | 1 & 2 | 345   | 2020-12-23 |
| NCT04715997 | Safety and Immunogenicity Study of GX-19N, a COVID-19 Preventive DNA Vaccine in Healthy Adults                           | IM  | GX-19N                                   | 18 Years to 55 Years  | 1 & 2 | 170   | 2020-12-30 |
| NCT04742842 | The Safety and Immunogenicity of a DNA-based Vaccine (COVIGEN) in Healthy Volunteers                                     | IM  | COVIGEN                                  | 18 Years to 75 Years  | 1     | 150   | 2021-02-15 |
| NCT04788459 | Safety and Immunogenicity of COVID-eVax, a Candidate Plasmid DNA Vaccine for COVID-19, in Healthy Adult Volunteers       | IM  | COVID-eVax                               | 18 Years to 65 Years  | 1 & 2 | 160   | 2021-02-25 |
| NCT04864561 | Study To Compare The Immunogenicity Against COVID-19, Of VLA2001 Vaccine To AZD1222 Vaccine                              | IM  | AZD1222 vs VLA2001                       | 18 Years and older    | 3     | 4000  | 2021-04-26 |
| NCT04892459 | Study on Sequential Immunization of Inactive SARS-CoV-2 Vaccine and Recombinant SARS-CoV-2 Vaccine (Ad5 Vector)          | UNS | SARS-CoV-2 Ad5 vs Inactivated SARS-CoV-2 | 18 Years to 59 Years  | 4     | 300   | 2021-05-19 |
| NCT04313127 | Phase I Clinical Trial of a COVID-19 Vaccine in 18-60 Healthy Adults                                                     | IM  | Ad5-nCoV                                 | 18 Years to 60 Years  | 1     | 108   | 2020-03-16 |
| NCT04341389 | A Phase II Clinical Trial to Evaluate the Recombinant Vaccine for COVID-19 (Adenovirus Vector)                           | IM  | Ad5-nCoV                                 | 18 Years and older    | 2     | 500   | 2020-04-12 |
| NCT04324606 | A Study of a Candidate COVID-19 Vaccine (COV001)                                                                         | IM  | AZD1222                                  | 18 Years to 55 Years  | 1 & 2 | 1112  | 2020-04-20 |
| NCT04398147 | Phase I/II Clinical Trial of Recombinant Novel Coronavirus Vaccine (Adenovirus Type 5 Vector) in Canada                  | IM  | Ad5-nCoV                                 | 18 Years to 84 Years  | 1 & 2 | 696   | 2020-05-01 |
| NCT04400838 | Investigating a Vaccine Against COVID-19                                                                                 | IM  | AZD1222                                  | 5 Years and older     | 2 & 3 | 12330 | 2020-05-28 |
| NCT04536051 | A Study of a Candidate COVID-19 Vaccine (COV003)                                                                         | IM  | AZD1222                                  | 18 Years and older    | 3     | 10300 | 2020-06-02 |
| NCT04436471 | An Open Study of the Safety, Tolerability and Immunogenicity of the Drug "Gam-COVID-Vac" Vaccine Against COVID-19        | IM  | Gam-COVID-Vac                            | 18 Years to 60 Years  | 1 & 2 | 38    | 2020-06-17 |
| NCT04437875 | An Open Study of the Safety, Tolerability and Immunogenicity of "Gam-COVID-Vac Lyo" Vaccine Against COVID-19             | IM  | Gam-COVID-Vac Lyo                        | 18 Years to 60 Years  | 1 & 2 | 38    | 2020-06-17 |
| NCT04444674 | COVID-19 Vaccine (ChAdOx1 nCoV-19) Trial in South African Adults With and Without HIV-infection                          | IM  | AZD1222                                  | 18 Years to 65 Years  | 1 & 2 | 2000  | 2020-06-24 |
| NCT04436276 | A Study of Ad26.COV2.S in Adults (COVID-19)                                                                              | IM  | Ad26.COV2.S                              | 18 Years and older    | 1 & 2 | 1045  | 2020-07-15 |
| NCT04528641 | GRAd-COV2 Vaccine Against COVID-19                                                                                       | IM  | GRAd-COV2                                | 18 Years to 85 Years  | 1     | 90    | 2020-08-10 |
| NCT04497298 | Clinical Trial to Evaluate the Safety and Immunogenicity of the COVID-19 Vaccine                                         | IM  | TMV-083                                  | 18 Years to 55 Years  | 1     | 90    | 2020-08-10 |
| NCT04509947 | A Study of Ad26.COV2.S in Adults (COVID-19)                                                                              | IM  | Ad26.COV2.S                              | 20 Years and older    | 1     | 250   | 2020-08-11 |
| NCT04516746 | Phase III Double-blind, Placebo-controlled Study of AZD1222 for the Prevention of COVID-19 in Adults                     | IM  | AZD1222                                  | 18 Years and older    | 3     | 30000 | 2020-08-17 |
| NCT04568031 | Study of AZD1222 for the Prevention of COVID-19 in Japan                                                                 | IM  | AZD1222                                  | 18 Years and older    | 1 & 2 | 256   | 2020-08-23 |
| NCT04526990 | Phase III Trial of A COVID-19 Vaccine of Adenovirus Vector in Adults 18 Years Old and Above                              | IM  | Ad5-nCoV                                 | 18 Years and older    | 3     | 40000 | 2020-08-26 |
| NCT04498247 | A Study to Assess Safety, Tolerability, and Immunogenicity of V591 (COVID-19 Vaccine) in Healthy Participants (V591-001) | IM  | V591                                     | 18 Years and older    | 1 & 2 | 260   | 2020-08-27 |
| NCT04530396 | Clinical Trial of Efficacy, Safety, and Immunogenicity of Gam-COVID-Vac Vaccine Against COVID-19                         | IM  | Gam-COVID-Vac                            | 18 Years to 111 Years | 3     | 40000 | 2020-08-31 |
| NCT04540393 | AZD1222 Vaccine for the Prevention of COVID-19                                                                           | IM  | AZD1222                                  | 18 Years to 130 Years | 3     | 100   | 2020-09-02 |



|                      |             |                                                                                                                                                                        |      |                                    |                           |       |       |            |
|----------------------|-------------|------------------------------------------------------------------------------------------------------------------------------------------------------------------------|------|------------------------------------|---------------------------|-------|-------|------------|
|                      | NCT04505722 | A Study of Ad26.COVS.2 for the Prevention of SARS-CoV-2-Mediated COVID-19 in Adult Participants                                                                        | IM   | Ad26.COVS.2                        | 18 Years and older        | 3     | 60000 | 2020-09-05 |
|                      | NCT04540419 | Clinical Trial of Recombinant Novel Coronavirus Vaccine (Adenovirus Type 5 Vector) Against COVID-19                                                                    | IM   | Ad5-nCoV                           | 18 Years to 85 Years      | 3     | 500   | 2020-09-11 |
|                      | NCT04563702 | Safety and Immunogenicity Trial of an Oral SARS-CoV-2 Vaccine (VXA-CoV2-1) for Prevention of COVID-19 in Healthy Adults                                                | ORAL | VXA-CoV2-1                         | 18 Years to 54 Years      | 1     | 35    | 2020-09-21 |
|                      | NCT04566770 | A Clinical Trial of A COVID-19 Vaccine Named Recombinant Novel Coronavirus Vaccine (Adenovirus Type 5 Vector)                                                          | IM   | Ad5-nCoV                           | 6 Years and older         | 2     | 481   | 2020-09-24 |
|                      | NCT04568811 | Phase I Clinical Trial of Booster vaccination of Adenovirus Type-5 Vectored COVID-19 Vaccine                                                                           | UNS  | Ad5-nCoV                           | Child, Adult, Older Adult | 1     | 89    | 2020-09-26 |
|                      | NCT04564716 | Clinical Trial of Efficacy, Safety, and Immunogenicity of Gam-COVID-Vac Vaccine Against COVID-19 in Belarus                                                            | IM   | Gam-COVID-Vac                      | 18 Years to 60 Years      | 3     | 100   | 2020-09-28 |
|                      | NCT04552366 | A Clinical Trial of a Recombinant Adenovirus 5 Vectored COVID-19 Vaccine (Ad5-nCoV) With Two Doses in Healthy Adults                                                   | IM   | Ad5-nCoV                           | 18 Years and older        | 1     | 144   | 2020-09-29 |
|                      | NCT04569383 | Safety, Tolerability and Immunogenicity of the Candidate Vaccine MVA-SARS-2-S Against COVID-19                                                                         | UNS  | MVA-SARS-2-S                       | 18 Years to 55 Years      | 1     | 30    | 2020-10-01 |
|                      | NCT04591717 | Study of the Safety of Prophylactic Vaccination With 2nd Generation E1/E2B/E3-Deleted Adenoviral-COVID-19 in Normal Healthy Volunteers                                 | UNS  | hAd5-S-Fusion+N-ETSD               | 18 Years to 55 Years      | 1     | 35    | 2020-10-19 |
|                      | NCT04587219 | The Study of "Gam-COVID-Vac" Vaccine Against COVID-19 With the Participation of Volunteers of 60 y.o and Older                                                         | IM   | Gam-COVID-Vac                      | 60 Years to 111 Years     | 2     | 110   | 2020-10-22 |
| Viral vector vaccine | NCT04608305 | Evaluate the Safety, Immunogenicity and Potential Efficacy of an rVSV-SARS-CoV-2-S Vaccine                                                                             | UNS  | IIBR-100                           | 18 Years to 85 Years      | 1 & 2 | 1040  | 2020-10-28 |
|                      | NCT04569786 | Dose Ranging Trial to Assess Safety and Immunogenicity of V590 (COVID-19 Vaccine) in Healthy Adults (V590-001)                                                         | IM   | V590                               | 18 Years and older        | 1     | 252   | 2020-10-30 |
|                      | NCT04642339 | Clinical Trial of the Immunogenicity, Safety, and Efficacy of the Gam-COVID-Vac Vaccine Against COVID-19 in Venezuela                                                  | IM   | Gam-COVID-Vac                      | 18 Years and older        | 3     | 2000  | 2020-11-01 |
|                      | NCT04614948 | A Study of Ad26.COVS.2 for the Prevention of SARS-CoV-2-mediated COVID-19 in Adults                                                                                    | IM   | Ad26.COVS.2                        | 18 Years and older        | 3     | 30000 | 2020-11-15 |
|                      | NCT04639466 | A Synthetic MVA-based SARS-CoV-2 Vaccine, COH04S1, for the Prevention of COVID-19                                                                                      | IM   | COH04S1                            | 18 Years to 55 Years      | 1     | 129   | 2020-11-25 |
|                      | NCT04640233 | Clinical Trial to Assess Safety and Immunogenicity of Gam-COVID-Vac Combined Vector Vaccine for Severe Acute Respiratory Syndrome Coronavirus 2 (SARS-CoV-2) Infection | IM   | Gam-COVID-Vac                      | 18 Years and older        | 2 & 3 | 1600  | 2020-12-01 |
|                      | NCT04656613 | A Phase III Clinical Trial of the Immunogenicity and Safety of the Gam-COVID-Vac Vaccine Against COVID-19 in the UAE                                                   | IM   | Gam-COVID-Vac                      | 18 Years and older        | 3     | 1000  | 2020-12-01 |
|                      | NCT04666012 | Safety and Immunogenicity Study of AdCLD-CoV19: A COVID-19 Preventive Vaccine in Healthy Volunteers                                                                    | IM   | AdCLD-CoV19                        | 19 Years to 64 Years      | 1 & 2 | 150   | 2020-12-29 |
|                      | NCT04738435 | Safety of the Sputnik V Vaccine in Health Personnel of Private Effectors of the City of Buenos Aires, Argentina                                                        | UNS  | Sputnik V                          | 18 Years and older        | N/A   | 600   | 2021-01-05 |
|                      | NCT04723602 | Evaluation of Safety, Tolerability and Immune Responses of Ebola-S and Marburg Vaccines in Healthy Adults                                                              | IM   | cAd3-EBO-S                         | 18 Years to 50 Years      | 1     | 32    | 2021-01-06 |
|                      | NCT04713488 | An Open Study on the Safety, Tolerability, and Immunogenicity of "Sputnik Light" Vaccine                                                                               | IM   | Sputnik Light                      | 18 Years to 111 Years     | 1 & 2 | 110   | 2021-01-15 |
|                      | NCT04679909 | Safety and Immunogenicity of AdCOVID in Healthy Adults (COVID-19 Vaccine Study)                                                                                        | IN   | Biological: AdCOVID Other: Placebo | 18 Years to 55 Years      | 1     | 180   | 2021-02-01 |

|                                       |                                                                                                                                                                                                                                                                           |      |                                |                       |       |      |            |
|---------------------------------------|---------------------------------------------------------------------------------------------------------------------------------------------------------------------------------------------------------------------------------------------------------------------------|------|--------------------------------|-----------------------|-------|------|------------|
| NCT04730895                           | Isotretinoin (13- Cis-Retinoic Acid) Versus Spike Protein Based Vaccine for Providing Complete Protection Against COVID-19 and Preventing the Expected Long Term Serious Side Effects Which May Caused by Spike Protein Based Vaccine-An Urgent Protective Clinical Trial | UNS  | AZD1222                        | 18 Years to 40 Years  | 1 & 2 | 360  | 2021-02-01 |
| NCT04741061                           | Study to Evaluate Efficacy, Immunogenicity and Safety of the Sputnik-Light COVID-19 Oral and Subcutaneous Vaccination                                                                                                                                                     | UNS  | Sputnik Light                  | 18 Years to 111 Years | 3     | 6000 | 2021-02-19 |
| NCT04732468                           | Using a 2nd Generation (E1/E2B/E3-Deleted) Adenovirus Platform in Healthy Volunteers in the USA                                                                                                                                                                           | SC   | hAd5-S-Fusion+N-ETSD           | 18 Years to 55 Years  | 1     | 65   | 2021-02-24 |
| NCT04751682                           | Safety and Immunogenicity of an Intranasal SARS-CoV-2 Vaccine (BBV154) for COVID-19                                                                                                                                                                                       | IN   | BBV154                         | 18 Years to 60 Years  | 1     | 175  | 2021-03-01 |
| NCT04809948                           | Effects of COVID 19 Vaccine on Egyptian Population                                                                                                                                                                                                                        | UNS  | Viral vector                   | 18 Years to 80 Years  | N/A   | 800  | 2021-03-01 |
| NCT04710303                           | COVID-19 Vaccination Using a 2nd Generation (E1/E2B/E3-Deleted) Adenoviral Platform in Healthy South African Adults                                                                                                                                                       | UNS  | hAd5-S-Fusion+N-ETSD           | 18 Years to 50 Years  | 1     | 35   | 2021-03-02 |
| NCT04830800                           | A Phase 1/2 Safety and Immunogenicity Trial of COVID-19 Vaccine COVIVAC                                                                                                                                                                                                   | IM   | COVIVAC                        | 18 Years to 75 Years  | 1 & 2 | 420  | 2021-03-10 |
| NCT04765384                           | A Study of Ad26.COV2.S in Healthy Pregnant Participants (COVID-19)                                                                                                                                                                                                        | IM   | Ad26.COV2.S                    | 18 Years to 45 Years  | 2     | 400  | 2021-03-12 |
| NCT04760730                           | Safety and Immunogenicity Study in Adults of AZD1222 and rAd26-S Administered as Heterologous Prime Boost Regimen for the Prevention of Coronavirus Disease 2019 (COVID-19)                                                                                               | IM   | AZD1222                        | 18 Years to 100 Years | 1 & 2 | 100  | 2021-03-17 |
| NCT04794946                           | Safety and Efficacy of a Non-replicating ChAdOx1 Vector Vaccine AZD1222 (COVISHIELD), for Prevention of COVID-19 in Patients With Liver Cirrhosis                                                                                                                         | UNS  | AZD1222                        | 18 Years to 60 Years  | N/A   | 2200 | 2021-03-19 |
| NCT04764422                           | Assess the Safety and Immunogenicity of NDV-HXP-S Vaccine in Thailand                                                                                                                                                                                                     | IM   | NDV-HXP-S                      | 18 Years to 75 Years  | 1 & 2 | 460  | 2021-03-20 |
| NCT04809389                           | A Study to Evaluate Safety and Immunogenicity of DelNS1-nCoV-RBD LAIV for COVID-19                                                                                                                                                                                        | IN   | DelNS1-nCoV-RBD LAIV           | 18 Years to 55 Years  | 1     | 115  | 2021-03-29 |
| NCT04684446                           | AstraZeneca Vax - Sputnik V Combination Study                                                                                                                                                                                                                             | IM   | AZD1222                        | 18 Years to 130 Years | 1 & 2 | 100  | 2021-03-30 |
| NCT04816019                           | A Study of Intranasal ChAdOx1 nCoV-19                                                                                                                                                                                                                                     | IN   | AZD1222                        | 18 Years to 40 Years  | 1     | 54   | 2021-04-01 |
| NCT04871841                           | Study of Sputnik V COVID-19 Vaccination in Adults in Kazakhstan                                                                                                                                                                                                           | IM   | Sputnik V                      | 18 Years and older    | N/A   | 70   | 2021-04-05 |
| NCT04798001                           | Safety and Immunogenicity of an Intranasal RSV Vaccine Expressing SARS-CoV-2 Spike Protein (COVID-19 Vaccine) in Adults                                                                                                                                                   | IN   | MV-014-212                     | 18 Years to 69 Years  | 1     | 130  | 2021-04-12 |
| NCT04840992                           | Phase I/II Clinical Trial of Recombinant Novel Coronavirus (COVID-19) Vaccine (Adenovirus Type 5 Vector) for Inhalation                                                                                                                                                   | IM   | Ad5-nCoV                       | 18 Years and older    | 1 & 2 | 840  | 2021-04-20 |
| NCT04871737                           | Study of a Live rNDV Based Vaccine Against COVID-19                                                                                                                                                                                                                       | IM   | Newcastle Disease virus vector | 18 Years to 55 Years  | 1     | 90   | 2021-05-01 |
| NCT04894305                           | A Study of Ad26.COV2.S in Healthy Adults (COVID-19)                                                                                                                                                                                                                       | IM   | Ad26.COV2.S                    | 18 Years to 65 Years  | 1     | 380  | 2021-05-14 |
| NCT04839042                           | A Phase 1, First-In-Human Study of the Investigational COVID-19 Vaccine SC-Ad6-1 in Healthy Volunteers                                                                                                                                                                    | IM   | SC-Ad6-1                       | 18 Years to 55 Years  | 1     | 40   | 2021-06-01 |
| Bacteria l vector vaccine NCT04334980 | Evaluating the Safety, Tolerability and Immunogenicity of bacTRL-Spike Vaccine for Prevention of COVID-19                                                                                                                                                                 | ORAL | bacTRL-Spike                   | 19 Years to 45 Years  | 1     | 84   | 2020-04-30 |
| NCT04352608                           | Safety and Immunogenicity Study of 2019-nCoV Vaccine (Inactivated) for Prophylaxis SARS CoV-2 Infection (COVID-19)                                                                                                                                                        | UNS  | Inactivated                    | 18 Years to 59 Years  | 1 & 2 | 744  | 2020-04-13 |
| NCT04412538                           | Safety and Immunogenicity Study of an Inactivated SARS-CoV-2 Vaccine for Preventing Against COVID-19                                                                                                                                                                      | UNS  | Inactivated                    | 18 Years to 59 Years  | 1 & 2 | 942  | 2020-05-15 |

|                           |             |                                                                                                                                                                   |      |                         |                       |       |       |            |
|---------------------------|-------------|-------------------------------------------------------------------------------------------------------------------------------------------------------------------|------|-------------------------|-----------------------|-------|-------|------------|
|                           | NCT04383574 | Safety and Immunogenicity Study of Inactivated Vaccine for Prevention of SARS-CoV-2 Infection(COVID-19)                                                           | UNS  | Inactivated             | 60 Years and older    | 1 & 2 | 422   | 2020-05-20 |
|                           | NCT04380532 | Tableted COVID-19 Therapeutic Vaccine                                                                                                                             | ORAL | V-SARS                  | 18 Years to 65 Years  | 1 & 2 | 20    | 2020-06-15 |
|                           | NCT04470609 | Safety and Immunogenicity Study of an Inactivated SARS-CoV-2 Vaccine for Preventing Against COVID-19 in People Aged 20 Years                                      | UNS  | Inactivated             | 60 Years and older    | 1 & 2 | 471   | 2020-07-10 |
|                           | NCT04471519 | Whole-Virion Inactivated SARS-CoV-2 Vaccine (BBV152) for COVID-19 in Healthy Volunteers                                                                           | IM   | BBV152                  | 12 Years to 65 Years  | 1 & 2 | 1125  | 2020-07-13 |
|                           | NCT04510207 | A Study to Evaluate The Efficacy, Safety and Immunogenicity of Inactivated SARS-CoV-2 Vaccines (Vero Cell) in Healthy Population Aged 18 Years Old and Above      | UNS  | Inactivated (Vero cell) | 18 Years and older    | 3     | 45000 | 2020-07-16 |
|                           | NCT04456595 | Clinical Trial of Efficacy and Safety of Sinovac's Adsorbed COVID-19 (Inactivated) Vaccine in Healthcare Professionals                                            | IM   | Inactivated             | 18 Years and older    | 3     | 8870  | 2020-07-21 |
|                           | NCT04508075 | Efficacy, Safety and Immunogenicity Study of SARS-CoV-2 Inactivated Vaccine                                                                                       | IM   | Inactivated             | 18 Years to 59 Years  | 3     | 1620  | 2020-08-10 |
|                           | NCT04530357 | Reactogenicity, Safety and Immunogenicity of QazCovid-in® COVID-19 Vaccine                                                                                        | IM   | QazCovid-in®            | 18 Years to 100 Years | 1 & 2 | 244   | 2020-09-01 |
|                           | NCT04612972 | Efficacy, Safety and Immunogenicity of Inactivated SARS-CoV-2 Vaccines (Vero Cell) in Healthy Adult Population In Peru                                            | UNS  | Inactivated (Vero cell) | 18 Years to 60 Years  | 3     | 6000  | 2020-09-10 |
|                           | NCT04582344 | Clinical Trial For SARS-CoV-2 Vaccine (COVID-19)                                                                                                                  | IM   | CoronaVac               | 18 Years to 59 Years  | 3     | 13000 | 2020-09-14 |
|                           | NCT04560881 | Clinical Trial to Evaluate the Efficacy, Immunogenicity and Safety of the Inactivated SARS-CoV-2 Vaccine (COVID-19)                                               | IM   | Inactivated (Vero cell) | 18 Years to 85 Years  | 3     | 3000  | 2020-09-16 |
|                           | NCT04758273 | A Safety and Immunogenicity Study of Inactivated SARS-CoV-2 Vaccine (Vero Cells) in Healthy Population Aged 18 Years and Above(COVID-19)                          | UNS  | Inactivated             | 18 Years and older    | 1     | 180   | 2020-10-07 |
|                           | NCT04756323 | A Study to Evaluate Safety and Immunogenicity of Inactivated SARS-CoV-2 Vaccine (Vero Cells) in Healthy Population Aged 18 Years and Above(COVID-19)              | UNS  | Inactivated             | 18 Years and older    | 2     | 1000  | 2020-10-27 |
|                           | NCT04617483 | Study of the Commercial Scale SARS-CoV-2 Vaccine Against the Pilot Scale Among Adults, and Bridging Study of the Immunogenicity in Elderly Against That in Adults | UNS  | Inactivated             | 18 Years and older    | 3     | 1040  | 2020-10-31 |
|                           | NCT04551547 | Safety and Immunogenicity Study of Inactivated Vaccine for Prevention of COVID-19                                                                                 | UNS  | Inactivated             | 3 Years to 17 Years   | 1 & 2 | 552   | 2020-10-31 |
|                           | NCT04691947 | Safety and Immunogenicity of Two Different Strengths of the Inactivated COVID-19 Vaccine ERUCOV-VAC                                                               | IM   | ERUCOV-VAC              | 18 Years to 55 Years  | 1     | 44    | 2020-11-05 |
| Inactivated virus vaccine | NCT04641481 | An Efficacy and Safety Clinical Trial of an Investigational COVID-19 Vaccine (BBV152) in Adult Volunteers                                                         | UNS  | BBV152                  | 18 Years to 99 Years  | 3     | 25800 | 2020-11-25 |
|                           | NCT04651790 | Efficacy, Safety, and Immunogenicity of Two Vaccination Schedules of an Inactivated Vaccine Against COVID-19 in Adults                                            | UNS  | Inactivated             | 18 Years and older    | 3     | 2300  | 2020-11-27 |
|                           | NCT04691908 | Immunogenicity, Efficacy and Safety of QazCovid-in® COVID-19 Vaccine                                                                                              | IM   | QazCovid-in®            | 18 Years and older    | 3     | 3000  | 2020-12-25 |
|                           | NCT04795414 | Safety and Immunogenicity of an Inactivated Vaccine Against COVID-19 in Medical Workers                                                                           | UNS  | Inactivated (Vero cell) | 18 Years to 59 Years  | N/A   | 1370  | 2021-01-14 |
|                           | NCT04659239 | The Efficacy, Safety and Immunogenicity Study of Inactivated SARS-CoV-2 Vaccine for Preventing Against COVID-19                                                   | UNS  | Inactivated (Vero cell) | 18 Years and older    | 3     | 34020 | 2021-01-28 |
|                           | NCT04756830 | A Study to Assess the Safety and Immunogenicity of the Coronavac Vaccine Against COVID-19                                                                         | UNS  | Inactivated             | 18 Years and older    | 4     | 1200  | 2021-02-01 |
|                           | NCT04747821 | An Effectiveness Study of the Sinovac's Adsorbed COVID-19 (Inactivated) Vaccine                                                                                   | UNS  | Inactivated             | 18 Years and older    | 4     | 27711 | 2021-02-07 |
|                           | NCT04754698 | COVID-19 CoronaVac in Patients With Autoimmune Rheumatic Diseases and HIV/AIDS                                                                                    | UNS  | CoronaVac               | 18 Years and older    | 4     | 2067  | 2021-02-09 |

|                     |             |                                                                                                                                                                  |     |                            |                      |       |       |            |
|---------------------|-------------|------------------------------------------------------------------------------------------------------------------------------------------------------------------|-----|----------------------------|----------------------|-------|-------|------------|
|                     | NCT04824391 | Efficacy, Immunogenicity and Safety of Inactivated ERUCOV-VAC Compared With Placebo in COVID-19                                                                  | IM  | ERUCOV-VAC                 | 18 Years to 64 Years | 2     | 250   | 2021-02-10 |
|                     | NCT04756271 | Safety and Immunogenicity of Inactivated Vaccine Against COVID-19 Infection                                                                                      | UNS | Inactivated                | 18 Years and older   | 3     | 140   | 2021-02-11 |
|                     | NCT04790851 | Evaluation of Immunogenicity and Safety of Combined Immunization of COVIV and PPV23 / IIV4                                                                       | UNS | COVIV                      | 18 Years and older   | 4     | 1152  | 2021-02-23 |
|                     | NCT04801888 | Study on Combined Vaccination With SARS-CoV-2 Inactivated Vaccine and Quadrivalent Influenza Vaccine                                                             | UNS | Inactivated                | 18 Years to 59 Years | 4     | 480   | 2021-03-01 |
|                     | NCT04854408 | Evaluation of the Effect of Coronavac Vaccine (Severe Acute Respiratory Syndrome Coronavirus 2 (SARS-CoV-2 Vaccine) on Healthcare Workers' Menstrual Patterns    | UNS | CoronoVAC                  | 18 Years to 45 Years | N/A   | 300   | 2021-03-18 |
|                     | NCT04789356 | Effectiveness of the Adsorbed Vaccine COVID-19 (Coronavac) Among Education and Public Safety Workers With Risk Factors for Severity                              | IM  | Inactivated                | 18 Years to 49 Years | 4     | 10156 | 2021-03-18 |
|                     | NCT04838080 | Safety and Immunogenicity of the Inactivated Koçak-19 İnaktif Adjuvanlı COVID-19 Vaccine Compared to Placebo                                                     | IM  | Koçak-19 İnaktif Adjuvanlı | 18 Years to 55 Years | 1     | 38    | 2021-03-19 |
|                     | NCT04765215 | Investigation of the Effectiveness of CoronaVac Vaccine in Cancer Patients With Active Chemotherapy and Comparison With Healthy People.                          | UNS | CoronoVAC                  | 18 Years to 90 Years | N/A   | 291   | 2021-03-31 |
|                     | NCT04866069 | Study of a Severe Acute Respiratory Syndrome-Coronavirus-2 (SARS-CoV-2) Adjuvanted Inactivated Vaccine in Healthy Adults                                         | SC  | Inactivated                | 18 Years to 45 Years | 1     | 50    | 2021-04-25 |
|                     | NCT04863638 | A Immuno-bridging and Immunization Schedules Study of COVID-19 Vaccine (Vero Cell), Inactivated                                                                  | UNS | Inactivated (vero cell)    | 3 Years and older    | 4     | 4400  | 2021-04-29 |
|                     | NCT04852705 | A Study to Evaluate the Efficacy, Safety and Immunogenicity of SARS-CoV-2 Vaccine (Vero Cells), Inactivated in Healthy Adults Aged 18 Years and Older (COVID-19) | IM  | Inactivated (vero cell)    | 18 Years and older   | 3     | 28000 | 2021-05-01 |
|                     | NCT04884685 | Safety of an Inactivated SARS-CoV-2 Vaccine (CoronaVac) in Children and Adolescents                                                                              | IM  | Inactivated                | 3 Years to 17 Years  | 2     | 500   | 2021-05-03 |
| Virus-like particle | NCT04450004 | Safety, Tolerability and Immunogenicity of a Coronavirus-Like Particle COVID-19 Vaccine in Adults Aged 18-55 Years.                                              | IM  | Coronavirus-Like Particle  | 18 Years to 55 Years | 1     | 180   | 2020-07-10 |
|                     | NCT04636697 | Study of a Recombinant Coronavirus-Like Particle COVID-19 Vaccine in Adults                                                                                      | IM  | Coronavirus-Like Particle  | 18 Years and older   | 2 & 3 | 30612 | 2020-11-19 |
|                     | NCT04839146 | Safety and Tolerability of COVID-19 Vaccine (ABNCoV2)                                                                                                            | IM  | ABNCoV2 Vaccine            | 18 Years to 55 Years | 1     | 42    | 2021-03-11 |
|                     | NCT04773665 | Safety, Tolerability, and Immunogenicity of the COVID-19 Vaccine Candidate (VBI-2902a)                                                                           | IM  | VBI-2902a                  | 18 Years and older   | 1 & 2 | 780   | 2021-03-15 |
|                     | NCT04818281 | Study of a Severe Acute Respiratory Syndrome CoV-2 (SARS-CoV-2) Virus-like Particle (VLP) Vaccine in Healthy Adults                                              | SC  | SARS-CoV-2 VLP             | 18 Years to 59 Years | 1     | 36    | 2021-03-27 |
|                     | NCT04619628 | Safety and Immunogenicity of COVI-VAC, a Live Attenuated Vaccine Against COVID-19                                                                                | IV  | COVI-VAC                   | 18 Years to 30 Years | 1     | 48    | 2020-12-01 |
|                     | NCT04261426 | The Efficacy of Intravenous Immunoglobulin Therapy for Severe 2019-nCoV Infected Pneumonia                                                                       | IV  | IVIG                       | 18 Years and older   | 2 & 3 | 80    | 2020-02-10 |
|                     | NCT04350580 | Polyvalent Immunoglobulin in COVID-19 Related ARDs                                                                                                               | IV  | IVIG                       | 18 Years and older   | 3     | 138   | 2020-04-11 |
|                     | NCT04411667 | Study of Standard of Care Plus Intravenous Immunoglobulin (IVIG) Compared to Standard of Care Alone in the Treatment of COVID-19 Infection                       | IV  | Octagam                    | 18 Years and older   | 4     | 40    | 2020-04-28 |
|                     | NCT04500067 | Intravenous Immunoglobulin (IVIG, Bioven) Efficacy Assess for COVID-19 / SARS-CoV-2 Severe Pneumonia Complex Treatment                                           | IV  | IVIG                       | 18 Years and older   | 3     | 76    | 2020-05-07 |
|                     | NCT04432324 | Study to Evaluate the Safety and Efficacy of High Dose IVIG in Hospitalized Participants With Coronavirus Disease (COVID-19)                                     | IV  | IVIG                       | 18 Years and older   | 2     | 100   | 2020-06-01 |

|                  |             |                                                                                                                                                                                                                                   |      |                                                           |                           |                     |      |            |
|------------------|-------------|-----------------------------------------------------------------------------------------------------------------------------------------------------------------------------------------------------------------------------------|------|-----------------------------------------------------------|---------------------------|---------------------|------|------------|
| Immunoglobulin   | NCT04400058 | Octagam 10% Therapy in COVID-19 Patients With Severe Disease Progression                                                                                                                                                          | IV   | Octagam                                                   | 18 Years and older        | 3                   | 208  | 2020-06-01 |
|                  | NCT04429529 | Safety of TY027, a Treatment for COVID-19, in Humans                                                                                                                                                                              | IV   | TY027                                                     | 21 Years to 50 Years      | 1                   | 25   | 2020-06-09 |
|                  | NCT04521309 | SARS-CoV-2 Antibodies Based IVIG Therapy for COVID-19 Patients                                                                                                                                                                    | IV   | IVIG                                                      | 18 Years and older        | 1 & 2               | 50   | 2020-06-19 |
|                  | NCT04480424 | Study to Evaluate the Safety and Efficacy of High Dose Intravenous Immune Globulin (IVIG) Plus Standard Medical Treatment (SMT) Versus SMT Alone in Participants in Intensive Care Unit (ICU) With Coronavirus Disease (COVID-19) | IV   | GAMUNEX-C                                                 | 18 Years and older        | 2                   | 100  | 2020-07-01 |
|                  | NCT04469179 | Safety, Tolerability, and Pharmacokinetics of SAB-185 in Ambulatory Participants With COVID-19                                                                                                                                    | IV   | SAB-185                                                   | 18 Years to 60 Years      | 1                   | 21   | 2020-07-01 |
|                  | NCT04468958 | Safety, Tolerability, and Pharmacokinetics of SAB-185 in Healthy Participants                                                                                                                                                     | IV   | SAB-185                                                   | 18 Years to 60 Years      | 1                   | 28   | 2020-08-05 |
|                  | NCT04610502 | Efficacy and Safety of Two Hyperimmune Equine Anti Sars-CoV-2 Serum in COVID-19 Patients                                                                                                                                          | IV   | Equine immunoglobulin                                     | 18 Years and older        | 2                   | 26   | 2020-09-06 |
|                  | NCT04548557 | Intravenous Immunoglobulins for the Treatment of Covid-19 Patients: a Clinical Trial                                                                                                                                              | IV   | IVIG                                                      | 18 Years to 90 Years      | 3                   | 60   | 2020-09-15 |
|                  | NCT04514302 | Safety and Efficacy of Anti-SARS-CoV-2 Equine Antibody Fragments (INOSARS) for Hospitalized Patients With COVID-19                                                                                                                | IV   | Anti-SARS-CoV-2 equine immunoglobulin fragments (INOSARS) | 18 Years and older        | 1 & 2               | 51   | 2020-10-20 |
|                  | NCT04631666 | COVID-19 - Administration of the SARS-CoV-2-Neutralizing Monoclonal Antibody DZIF-10c (Infusion)                                                                                                                                  | IV   | DZIF-10c                                                  | 18 Years to 70 Years      | 1 & 2               | 69   | 2020-11-23 |
|                  | NCT04631705 | COVID-19 - Administration of the SARS-CoV-2-Neutralizing Monoclonal Antibody DZIF-10c (Inhalation)                                                                                                                                | ORAL | DZIF-10c                                                  | 18 Years to 70 Years      | 1 & 2               | 69   | 2020-11-23 |
|                  | NCT04649515 | Efficacy and Safety of TY027, a Treatment for COVID-19, in Humans                                                                                                                                                                 | IV   | TY027                                                     | 21 Years to 100 Years     | 3                   | 1305 | 2020-12-04 |
| Passive immunity | NCT04891172 | Anti COVID 19 Intravenous Immunoglobulin (C-IVIG) Therapy for Severe COVID-19 Patients                                                                                                                                            | IV   | IVIG                                                      | 18 Years and older        | 2 & 3               | 310  | 2021-06-01 |
|                  | NCT04292340 | Anti-SARS-CoV-2 Inactivated Convalescent Plasma in the Treatment of COVID-19                                                                                                                                                      | IV   |                                                           | Child, Adult, Older Adult | Safety & efficacy v | 15   | 2020-02-01 |
|                  | NCT04321421 | Hyperimmune Plasma for Critical Patients With COVID-19                                                                                                                                                                            | IV   |                                                           | 18 Years and older        | N/A                 | 49   | 2020-03-17 |
|                  | NCT04389944 | Amotosalen-Ultraviolet A Pathogen-Inactivated Convalescent Plasma in Addition to Best Supportive Care and Antiviral Therapy on Clinical Deterioration in Adults Presenting With Moderate to Severe COVID-19                       | IV   |                                                           | 18 Years and older        | N/A                 | 15   | 2020-03-31 |
|                  | NCT04332380 | Convalescent Plasma for Patients With COVID-19: A Pilot Study                                                                                                                                                                     | IV   |                                                           | 18 Years to 60 Years      | 2                   | 10   | 2020-04-01 |
|                  | NCT04332835 | Convalescent Plasma for Patients With COVID-19: A Randomized, Open Label, Parallel, Controlled Clinical Study                                                                                                                     | IV   |                                                           | 18 Years to 60 Years      | 2 & 3               | 80   | 2020-04-01 |
|                  | NCT04342182 | Convalescent Plasma as Therapy for Covid-19 Severe SARS-CoV-2 Disease (CONCOVID Study)                                                                                                                                            | IV   |                                                           | 18 Years and older        | 2 & 3               | 426  | 2020-04-08 |
|                  | NCT04347681 | Potential Efficacy of Convalescent Plasma to Treat Severe COVID-19 and Patients at High Risk of Developing Severe COVID-19                                                                                                        | IV   |                                                           | 18 Years to 85 Years      | 2                   | 40   | 2020-04-12 |
|                  | NCT04333355 | Safety in Convalescent Plasma Transfusion to COVID-19                                                                                                                                                                             | IV   |                                                           | 18 Years and older        | 1                   | 20   | 2020-04-15 |
|                  | NCT04345991 | Efficacy of Convalescent Plasma to Treat COVID-19 Patients, a Nested Trial in the CORIMUNO-19 Cohort                                                                                                                              | IV   |                                                           | 18 Years and older        | 2                   | 120  | 2020-04-15 |
|                  | NCT04352751 | Experimental Use of Convalescent Plasma for Passive Immunization in Current COVID-19 Pandemic in Pakistan in 2020                                                                                                                 | IV   |                                                           | 18 Years to 55 Years      | N/A                 | 2000 | 2020-04-20 |
|                  | NCT04346446 | Efficacy of Convalescent Plasma Therapy in Severely Sick COVID-19 Patients                                                                                                                                                        | IV   |                                                           | 18 Years to 65 Years      | 2                   | 20   | 2020-04-21 |

|                            |             |                                                                                                                         |    |                      |       |      |            |
|----------------------------|-------------|-------------------------------------------------------------------------------------------------------------------------|----|----------------------|-------|------|------------|
| Conval<br>escent<br>plasma | NCT04362176 | Passive Immunity Trial of Nashville II                                                                                  | IV | 18 Years and older   | 3     | 500  | 2020-04-24 |
|                            | NCT04476888 | Convalescent Plasma Treatment in COVID-19                                                                               | IV | 18 Years and older   | N/A   | 100  | 2020-04-26 |
|                            | NCT04358783 | Convalescent Plasma Compared to the Best Available Therapy for the Treatment of SARS-CoV-2 Pneumonia                    | IV | 18 Years and older   | 2     | 30   | 2020-04-27 |
|                            | NCT04348656 | CONvalescent Plasma for Hospitalized Adults With COVID-19 Respiratory Illness (CONCOR-1)                                | IV | 16 Years and older   | 3     | 1200 | 2020-04-27 |
|                            | NCT04393727 | Transfusion of Convalescent Plasma for the Early Treatment of Patients With COVID-19                                    | IV | 18 Years and older   | 2     | 126  | 2020-05-01 |
|                            | NCT04377568 | Efficacy of Human Coronavirus-immune Convalescent Plasma for the Treatment of COVID-19 Disease in Hospitalized Children | IV | up to 18 Years       | 2     | 100  | 2020-05-01 |
|                            | NCT04407208 | Convalescent Plasma Therapy in Patients With COVID-19                                                                   | IV | 18 Years and older   | 1     | 10   | 2020-05-01 |
|                            | NCT04565197 | Convalescent Plasma Therapy for COVID-19 Patients                                                                       | IV | 15 Years to 80 Years | 1     | 20   | 2020-05-01 |
|                            | NCT04374565 | Convalescent Plasma for Treatment of COVID-19 Patients With Pneumonia                                                   | IV | 18 Years and older   | 2     | 29   | 2020-05-05 |
|                            | NCT04374526 | Early transfusion of Convalescent Plasma in Elderly COVID-19 Patients. to Prevent Disease Progression.                  | IV | 65 Years and older   | 2 & 3 | 182  | 2020-05-15 |
|                            | NCT04442958 | Effectiveness of Convalescent Immune Plasma Therapy                                                                     | IV | 18 Years to 90 Years | N/A   | 60   | 2020-05-15 |
|                            | NCT04622826 | plasmaApuane CoV-2 : Efficacy and Safety of Immune Covid-19 Plasma in Covid-19 Pneumonia in Non ITU Patients            | IV | 18 Years and older   | 2     | 50   | 2020-05-15 |
|                            | NCT04622826 | plasmaApuane CoV-2 : Efficacy and Safety of Immune Covid-19 Plasma in Covid-19 Pneumonia in Non ITU Patients            | IV | 18 Years and older   | 2     | 50   | 2020-05-15 |
|                            | NCT04385186 | Inactivated Convalescent Plasma as a Therapeutic Alternative in Patients CoViD-19                                       | IV | 18 Years and older   | 2     | 60   | 2020-05-20 |
|                            | NCT04403477 | Convalescent Plasma Therapy in Severe COVID-19 Infection                                                                | IV | 16 Years and older   | 2     | 20   | 2020-05-20 |
|                            | NCT04418518 | A Trial of CONvalescent Plasma for Hospitalized Adults With Acute COVID-19 Respiratory Illness                          | IV | 18 Years to 70 Years | 3     | 1200 | 2020-06-01 |
|                            | NCT04412486 | COVID-19 Convalescent Plasma (CCP) Transfusion                                                                          | IV | 18 Years and older   | 1     | 100  | 2020-06-01 |
|                            | NCT04373460 | Convalescent Plasma to Limit SARS-CoV-2 Associated Complications                                                        | IV | 18 Years and older   | 2     | 600  | 2020-06-03 |
|                            | NCT04425915 | Efficacy of Convalescent Plasma Therapy in Patients With COVID-19                                                       | IV | 18 Years and older   | 3     | 400  | 2020-06-09 |
|                            | NCT04323800 | Convalescent Plasma to Stem Coronavirus (CSSC-001)                                                                      | IV | 18 Years and older   | 2     | 500  | 2020-06-10 |
|                            | NCT04385186 | Inactivated Convalescent Plasma as a Therapeutic Alternative in Patients CoViD-19                                       | IV | 18 Years and older   | 2     | 60   | 2020-06-20 |
|                            | NCT04542967 | Study on the Safety and Efficacy of Convalescent Plasma in Patients With Severe COVID-19 Disease                        | IV | 18 Years to 90 Years | 2     | 150  | 2020-06-23 |
|                            | NCT04614012 | Hyperimmune Plasma for Patients With COVID-19                                                                           | IV | 18 Years and older   | N/A   | 100  | 2020-07-02 |
|                            | NCT04803370 | Efficacy of Reinforcing Standard Therapy in COVID-19 Patients With Repeated Transfusion of Convalescent Plasma          | IV | 18 Years and older   | N/A   | 100  | 2020-07-08 |
|                            | NCT04547660 | Convalescent Plasma for Severe COVID-19 Patients                                                                        | IV | 18 Years and older   | 3     | 160  | 2020-07-16 |
|                            | NCT04545047 | Observational Study of Convalescent Plasma for Treatment of Veterans With COVID-19                                      | IV | 18 Years and older   | N/A   | 4000 | 2020-08-07 |
|                            | NCT04355767 | Convalescent Plasma in Outpatients With COVID-19                                                                        | IV | 18 Years and older   | 3     | 600  | 2020-08-11 |
|                            | NCT04621123 | Plasma for Early Treatment in Non-hospitalised Mild or Moderate COVID-19 Patients                                       | IV | 50 Years and older   | 2     | 474  | 2020-10-30 |
|                            | NCT04644198 | Convalescent Plasma Transfusion in Severe COVID-19 Patients in Jamaica                                                  | IV | 18 Years to 65 Years | 2     | 30   | 2020-12-01 |

|                                |             |                                                                                                                                                                     |         |                                             |                      |       |     |            |
|--------------------------------|-------------|---------------------------------------------------------------------------------------------------------------------------------------------------------------------|---------|---------------------------------------------|----------------------|-------|-----|------------|
|                                | NCT04712344 | Assessment of Efficacy and Safety of Therapy With COVID-19 Convalescent Plasma in Subjects With Severe COVID-19 (IPCO)                                              | IV      |                                             | 18 Years and older   | 2     | 58  | 2021-01-18 |
|                                | NCT04148430 | A Study of Anakinra to Prevent or Treat Severe Side Effects for Patients Receiving CAR-T Cell Therapy                                                               | SC      | Anakinra                                    | 18 Years and older   | 2     | 90  | 2019-10-30 |
|                                | NCT04288713 | Eculizumab (Soliris) in Covid-19 Infected Patients                                                                                                                  | IV      | Eculizumab                                  | 18 Years and older   | N/A   |     | 2020-02-01 |
|                                | NCT04306705 | Tocilizumab vs CRRT in Management of Cytokine Release Syndrome (CRS) in COVID-19                                                                                    | IV      | Tocilizumab                                 | 18 Years to 80 Years | N/A   | 120 | 2020-02-20 |
|                                | NCT04324073 | Cohort Multiple Randomized Controlled Trials Open-label of Immune Modulatory Drugs and Other Treatments in COVID-19 Patients - Sarilumab Trial - CORIMUNO-19 - SARI | IV      | Sarilumab                                   | 18 Years and older   | 2 & 3 | 239 | 2020-03-27 |
|                                | NCT04331808 | CORIMUNO-19 - Tocilizumab Trial - TOCI (CORIMUNO-TOCI)                                                                                                              | IV      | Drug: Tocilizumab                           | 18 Years and older   | 2     | 228 | 2020-03-30 |
|                                | NCT04324021 | Efficacy and Safety of Emapalumab and Anakinra in Reducing Hyperinflammation and Respiratory Distress in Patients With COVID-19 Infection.                          | IV      | Biological: Emapalumab/Biological: Anakinra | 30 Years to 79 Years | 2 & 3 | 54  | 2020-04-02 |
|                                | NCT04332094 | Clinical Trial of Combined Use of Hydroxychloroquine, Azithromycin, and Tocilizumab for the Treatment of COVID-19                                                   | SC      | Tocilizumab                                 | 18 Years and older   | 2     | 276 | 2020-04-02 |
|                                | NCT04339712 | Personalised Immunotherapy for SARS-CoV-2 (COVID-19) Associated With Organ Dysfunction                                                                              | IV      | Anakinra vs Tocilizumab                     | 18 Years and older   | 2     | 102 | 2020-04-02 |
|                                | NCT04322773 | Anti-il6 Treatment of Serious COVID-19 Disease With Threatening Respiratory Failure                                                                                 | SC & IV | RoActemra                                   | 18 Years and older   | 2     | 200 | 2020-04-05 |
|                                | NCT04361552 | Tocilizumab for the Treatment of Cytokine Release Syndrome in Patients With COVID-19 (SARS-CoV-2 Infection)                                                         | IV      | Tocilizumab                                 | 18 Years and older   | 3     | 0   | 2020-04-07 |
|                                | NCT04341584 | CORIMUNO-ANA: Trial Evaluating Efficacy Of Anakinra In Patients With Covid-19 Infection                                                                             | IV      | Anakinra                                    | 18 Years and older   | 2     | 161 | 2020-04-08 |
|                                | NCT04341870 | Study of Immune Modulatory Drugs and Other Treatments in COVID-19 Patients: Sarilumab, Azithromycin, Hydroxychloroquine Trial - CORIMUNO-19 - VIRO                  | IV      | Sarilumab                                   | 18 Years to 80 Years | 2 & 3 | 27  | 2020-04-11 |
|                                | NCT04356508 | COVID-19: A Pilot Study of Adaptive Immunity and Anti-PD1                                                                                                           | IV      | Nivolumab                                   | 18 Years and older   | 2     | 15  | 2020-04-14 |
| Neutralized antibody/inhibitor | NCT04343144 | Trial Evaluating Efficacy and Safety of Nivolumab (Optivo®) in Patients With COVID-19 Infection, Nested in the Corimmuno-19 Cohort.                                 | IV      | Nivolumab                                   | 18 Years and older   | 2     | 92  | 2020-04-15 |
|                                | NCT04346797 | CORIMUNO19-ECU: Trial Evaluating Efficacy and Safety of Eculizumab (Soliris) in Patients With COVID-19 Infection, Nested in the CORIMUNO-19 Cohort                  | IV      | Eculizumab                                  | 18 Years to 75 Years | 2     | 120 | 2020-04-16 |
|                                | NCT04335071 | Tocilizumab in the Treatment of Coronavirus Induced Disease (COVID-19)                                                                                              | SC      | Tocilizumab                                 | 30 Years to 80 Years | 2     | 100 | 2020-04-26 |
|                                | NCT04371367 | Avdoralimab an Anti-C5aR Antibody, in Patients With COVID-19 Severe Pneumonia (FORCE )                                                                              | IV      | avdoralimab                                 | 18 Years to 80 Years | 2     | 108 | 2020-04-27 |
|                                | NCT04351152 | Phase 3 Study to Evaluate Efficacy and Safety of Lenzilumab in Hospitalized Patients With COVID-19 Pneumonia                                                        | IV      | Lenzilumab                                  | 18 Years to 85 Years | 3     | 238 | 2020-04-30 |
|                                | NCT04560205 | Tocilizumab in COVID-19 Lahore General Hospital                                                                                                                     | IV      | Tocilizumab                                 | 15 Years to 80 Years | 1     | 50  | 2020-05-01 |
|                                | NCT04370834 | Tocilizumab for Patients With Cancer and COVID-19 Disease                                                                                                           | IV      | Tocilizumab                                 | 2 Years and older    | 2     | 217 | 2020-05-28 |
|                                | NCT04413838 | Efficiency and Security of NIVOLUMAB Therapy in Obese Individuals With COVID-19(CORona Virus Disease) Infection                                                     | IV      | NIVOLUMAB                                   | 18 Years to 70 Years | 2     | 120 | 2020-06-15 |
|                                | NCT04494724 | Clazakizumab vs. Placebo - COVID-19 Infection                                                                                                                       | IV      | Clazakizumab                                | 18 Years and older   | 2     | 60  | 2020-07-13 |
|                                | NCT04540120 | Safety and Efficacy of Dapansutrole for Treatment of Moderate COVID-19 Symptoms and Evidence of Early Cytokine Release Syndrome                                     | ORAL    | dapansutrole capsules                       | 18 Years and older   | 2     | 80  | 2020-09-25 |
|                                | NCT04583956 | ACTIV-5 / Big Effect Trial (BET-A) for the Treatment of COVID-19                                                                                                    | IV      | Risankizumab                                | 18 Years to 99 Years | 2     | 200 | 2020-10-14 |

|               |             |                                                                                                                                                  |            |                                               |                      |       |      |            |
|---------------|-------------|--------------------------------------------------------------------------------------------------------------------------------------------------|------------|-----------------------------------------------|----------------------|-------|------|------------|
| Immunotherapy | NCT04583969 | ACTIV-5 / Big Effect Trial (BET-B) for the Treatment of COVID-19                                                                                 | IV         | Lenzilumab                                    | 18 Years to 99 Years | 2     | 200  | 2020-10-19 |
|               | NCT04600141 | Clinical Efficacy of Heparin and Tocilizumab in Patients With Severe COVID-19 Infection: a Randomized Clinical Trial                             | IV         | Tocilizumab                                   | 18 Years and older   | 3     | 308  | 2020-10-20 |
|               | NCT04734678 | Comparison of Tocilizumab Versus Tocilizumab/Infliximab in Patients With COVID-19-associated Cytokine Storm Syndrome                             | IV         | Tocilizumab vs Infliximab                     | 18 Years to 65 Years | N/A   | 84   | 2020-12-01 |
|               | NCT04646603 | MRG-001 as an Immunoregulatory and Regenerative Therapy for COVID-19 Patients                                                                    | SC         | MRG-001                                       | 18 Years to 45 Years | 1 & 2 | 18   | 2021-01-28 |
|               | NCT04710199 | Trial to Evaluate the Safety and Efficacy of Maraviroc in Patients Hospitalized for Coronavirus Disease 2019 (COVID-19)                          | ORAL       | Maraviroc                                     | 18 Years and older   | 2     | 40   | 2021-02-08 |
|               | NCT04276688 | Lopinavir/ Ritonavir, Ribavirin and IFN-beta Combination for nCoV Treatment                                                                      | SC         | Interferon Beta-1B                            | 18 Years and older   | 2     | 127  | 2020-02-10 |
|               | NCT04385095 | Trial of Inhaled Anti-viral (SNG001) for SARS-CoV-2 (COVID-19) Infection                                                                         | Inhalation | Interferon beta 1a                            | 18 Years and older   | 2     | 400  | 2020-03-16 |
|               | NCT04354259 | Interferon Lambda for Immediate Antiviral Therapy at Diagnosis in COVID-19                                                                       | UNS        | Peginterferon Lambda-1A                       | 18 Years and older   | 2     | 140  | 2020-05-13 |
|               | NCT04379076 | InterLeukin-7 (CYT107) to Improve Clinical Outcomes in Lymphopenic pAtients With COVID-19 Infection UK Cohort                                    | IM         | Interleukin-7                                 | 25 Years to 80 Years | 2     | 48   | 2020-05-14 |
|               | NCT04379518 | Rintatolimod and IFN Alpha-2b for the Treatment of Mild or Moderate COVID-19 Infection in Cancer Patients                                        | IV         | Interferon Alfa-2b                            | 18 Years and older   | 1 & 2 | 80   | 2020-05-30 |
|               | NCT04357444 | Low Dose of IL-2 In Acute Respiratory DistrEss Syndrome Related to COVID-19                                                                      | SC         | ILT101                                        | 18 Years and older   | 2     | 30   | 2020-06-01 |
|               | NCT04400929 | Using GM-CSF as a Host Directed Therapeutic Against COVID-19                                                                                     | IV         | Sargramostim                                  | 21 Years to 80 Years | 2     | 30   | 2020-06-01 |
|               | NCT04407689 | InterLeukin-7 to Improve Clinical Outcomes in Lymphopenic pAtients With COVID-19 Infection FR BL Cohort                                          | IM         | Interleukin-7                                 | 25 Years to 80 Years | 2     | 48   | 2020-06-08 |
|               | NCT04426201 | InterLeukin-7 to Improve Clinical Outcomes in Lymphopenic pAtients With COVID-19 Infection ( IM ILIAD-7-US-O )                                   | IM         | CYT107                                        | 25 Years to 80 Years | 2     | 48   | 2020-06-22 |
|               | NCT04442178 | InterLeukin-7 to Improve Clinical Outcomes in Lymphopenic pAtients With COVID-19 Infection ( IM ILIAD-7-US-I )                                   | IM         | CYT107                                        | 25 Years to 80 Years | 2     | 48   | 2020-06-30 |
|               | NCT04492475 | Adaptive COVID-19 Treatment Trial 3 (ACTT-3)                                                                                                     | SC         | Interferon beta-1a                            | 18 Years to 99 Years | 3     | 1038 | 2020-08-04 |
|               | NCT04498325 | Evaluating the Effect of NT-17, a Long Acting Interleukin-7, to Increase Lymphocyte Counts and Enhance Immune Clearance of SARS-CoV-2 (COVID-19) | IM         | NT-17                                         | 18 Years and older   | 1     | 42   | 2020-09-30 |
|               | NCT04810637 | A Study to Evaluate the Safety and Efficacy of GX-17 in Elderly Patients With Asymptomatic or Mild Symptoms of COVID-19                          | UNS        | GX-17                                         | 50 Years and older   | 2     | 210  | 2020-11-01 |
|               | NCT04730427 | Safety and Preliminary Efficacy Study of GX-17 in Patients With COVID-19                                                                         | UNS        | GX-17                                         | 19 Years and older   | 1     | 40   | 2021-01-01 |
| Cytokine      | NCT04299724 | Safety and Immunity of Covid-19 aAPC Vaccine                                                                                                     | SC         | APC                                           | 6 Months to 80 Years | 1     | 100  | 2020-02-15 |
|               | NCT04324996 | A Phase I/II Study of Universal Off-the-shelf NKG2D-ACE2 CAR-NK Cells for Therapy of COVID-19                                                    | IV         | NK                                            | 18 Years and older   | 1 & 2 | 90   | 2020-03-21 |
|               | NCT04276896 | Immunity and Safety of Covid-19 Synthetic Minigene Vaccine                                                                                       | SC & IV    | LV-SMENP-DC vaccine and antigen-specific CTLs | 6 Months to 80 Years | 1 & 2 | 100  | 2020-03-24 |
|               | NCT04344548 | Phase I / II Clinical Study of Immunotherapy Based on Adoptive Cell Transfer as a Therapeutic Alternative for Patients With COVID-19 in Colombia | IV         | NK                                            | 18 Years and older   | 1 & 2 | 10   | 2020-04-13 |
|               | NCT04365101 | Natural Killer Cell (CYNK-001) Infusions in Adults With COVID-19 (CYNK-001-COVID-19)                                                             | IV         | CYNK-001                                      | 18 Years and older   | 1 & 2 | 86   | 2020-05-13 |
|               | NCT04386252 | Phase Ib-II Trial of Dendritic Cell Vaccine to Prevent COVID-19 in Adults                                                                        | UNS        | AV-COVID-19                                   | 18 Years and older   | 1 & 2 | 180  | 2020-07-01 |



|             |             |                                                                                                                       |     |                                   |                      |       |     |            |
|-------------|-------------|-----------------------------------------------------------------------------------------------------------------------|-----|-----------------------------------|----------------------|-------|-----|------------|
| Immune cell | NCT03348670 | Follow NCT03305341 - Proof-of-Concept - COVID-19 AP TP Vaccine                                                        | IV  | CD54+ cells                       | 22 Years to 72 Years | 1     | 20  | 2020-07-20 |
|             | NCT04386252 | Phase Ib-II Trial of Dendritic Cell Vaccine to Prevent COVID-19 in Frontline Healthcare Workers and First Responders  | SC  | AV-COVID-19                       | 18 Years and older   | 1 & 2 | 180 | 2020-09-01 |
|             | NCT04578210 | Safety Infusion of NatuRal KillEr cells or MEemory T Cells as Adoptive Therapy in COVID-19 pnEumonia or Lymphopenia   | IV  | T & NK                            | up to 80 Years       | 1 & 2 | 58  | 2020-09-04 |
|             | NCT04482699 | RAPA-501-Allo Off-the-Shelf Therapy of COVID-19                                                                       | IV  | RAPA-501-Allo                     | 18 Years and older   | 1 & 2 | 88  | 2020-09-30 |
|             | NCT04401410 | Anti-SARS Cov-2 T Cell Infusions for COVID 19                                                                         | IV  | Partially HLA-matched SARS-CoVSTs | 18 Years and older   | 1     | 58  | 2020-10-30 |
|             | NCT04685603 | Dendritic Cell Vaccine to Prevent COVID-19                                                                            | UNS | AV-COVID-19                       | 18 Years and older   | 1     | 27  | 2020-12-07 |
|             | NCT04690387 | Dendritic Cell Vaccine, AV-COVID-19, to Prevent COVID-19 Infection                                                    | UNS | AV-COVID-19                       | 18 Years and older   | 1     | 27  | 2020-12-07 |
|             | NCT04634370 | Fase I Clinical Trial on NK Cells for COVID-19                                                                        | IV  | NK                                | 18 Years and older   | 1     | 24  | 2021-01-02 |
|             | NCT04765449 | Transfer of Infection Fighting Immune Cells Generated in the Laboratory to High Risk Patients With COVID-19 Infection | IV  | Cytotoxic T Lymphocytes           |                      | 1     | 24  | 2021-04-30 |

---
