# Supplementary material for: Safety and Seroconversion of Immunotherapies against SARS-CoV-2 Infection: A Systematic Review and Meta-Analysis of Clinical Trials
Source: MDPI journal article supplement (doi:10.3390/pathogens10121537), 2021-11-24
Supplement: s1 [file s1]

Table S1. Epidemiological data on COVID-19 cases and BCG programs among high income countries

| Location             | Confirmed | Cases per 1M people | Deaths  | mortality | Current BCG vaccination |
|----------------------|-----------|---------------------|---------|-----------|-------------------------|
| Italy                | 284,796   | 4,727               | 35,767  | 12.56     | no                      |
| United Kingdom       | 361,677   | 5,444               | 41,614  | 11.51     | no                      |
| Belgium              | 90,568    | 7,859               | 9,917   | 10.95     | no                      |
| France               | 363,350   | 5,417               | 30,893  | 8.50      | no                      |
| Netherlands          | 79,781    | 4,572               | 6,252   | 7.84      | no                      |
| Sweden               | 86,505    | 8,371               | 5,846   | 6.76      | no                      |
| Canada               | 135,626   | 3,571               | 9,163   | 6.76      | no                      |
| Spain                | 566,326   | 12,024              | 29,747  | 5.25      | no                      |
| Andorra              | 1,301     | 16,778              | 53      | 4.07      | no                      |
| Finland              | 8,512     | 1,540               | 336     | 3.95      | no                      |
| Slovenia             | 3,498     | 1,670               | 135     | 3.86      | no                      |
| Switzerland          | 46,239    | 5,385               | 1,740   | 3.76      | no                      |
| Germany              | 258,519   | 3,109               | 9,421   | 3.64      | no                      |
| Denmark              | 19,216    | 3,300               | 629     | 3.27      | no                      |
| Australia            | 26,565    | 1,035               | 797     | 3.00      | no                      |
| United States        | 6,462,503 | 19,610              | 192,795 | 2.98      | no                      |
| Austria              | 31,827    | 3,575               | 750     | 2.36      | no                      |
| Norway               | 11,867    | 2,211               | 265     | 2.23      | no                      |
| Luxembourg           | 7,088     | 11,546              | 124     | 1.75      | no                      |
| New Zealand          | 1,795     | 361                 | 24      | 1.34      | no                      |
| Israel               | 148,564   | 16,183              | 1,090   | 0.73      | no                      |
| Ireland              | 30,571    | 6,212               | 1,781   | 5.83      | yes                     |
| Hungary              | 10,909    | 1,116               | 631     | 5.78      | yes                     |
| Iran                 | 397,801   | 4,774               | 22,913  | 5.76      | yes                     |
| Barbados             | 180       | 627                 | 7       | 3.89      | yes                     |
| Poland               | 73,047    | 1,903               | 2,169   | 2.97      | yes                     |
| Portugal             | 62,813    | 6,112               | 1,855   | 2.95      | yes                     |
| Chile                | 430,535   | 22,533              | 11,850  | 2.75      | yes                     |
| Lithuania            | 3,243     | 1,161               | 86      | 2.65      | yes                     |
| Uruguay              | 1,759     | 500                 | 45      | 2.56      | yes                     |
| Estonia              | 2,632     | 1,981               | 64      | 2.43      | yes                     |
| Latvia               | 1,448     | 759                 | 35      | 2.42      | yes                     |
| Greece               | 12,734    | 1,187               | 300     | 2.36      | yes                     |
| Hong Kong            | 4,926     | 657                 | 99      | 2.01      | yes                     |
| Japan                | 73,901    | 587                 | 1,412   | 1.91      | yes                     |
| Croatia              | 13,107    | 3,215               | 211     | 1.61      | yes                     |
| Taiwan               | 498       | 21                  | 7       | 1.41      | yes                     |
| Saudi Arabia         | 324,407   | 9,481               | 4,213   | 1.30      | yes                     |
| Oman                 | 88,337    | 18,937              | 762     | 0.86      | yes                     |
| Seychelles           | 137       | 1,403               | 1       | 0.73      | yes                     |
| Malta                | 2,247     | 4,553               | 15      | 0.67      | yes                     |
| Kuwait               | 93,475    | 21,148              | 557     | 0.60      | yes                     |
| United Arab Emirates | 77,842    | 7,870               | 398     | 0.51      | yes                     |
| Qatar                | 121,287   | 44,148              | 205     | 0.17      | yes                     |
| Singapore            | 57,315    | 10,049              | 27      | 0.05      | yes                     |
| Greenland            | 14        | 250                 | 0       | 0.00      | yes                     |
